# Supplementary material
Source: PubMed Central journal article supplement (PMC4624342)
Supplement: mmc2.pdf [file mmc2.pdf]

## Article

## Effect of the N-Terminal Helix and Nucleotide Loading on the Membrane and Effector Binding of Arl2/3

Shobhna Kapoor,<sup>1,2</sup> Eyad K. Fansa,<sup>3</sup> Simone Möbitz,<sup>1</sup> Shehab A. Ismail,<sup>3,4</sup> Roland Winter,<sup>1</sup> Alfred Wittinghofer,<sup>3,\*</sup> and Katrin Weise<sup>1,\*</sup>

<sup>1</sup>Physical Chemistry I - Biophysical Chemistry, TU Dortmund University, Dortmund, Germany; <sup>2</sup>Department of Chemical Biology and <sup>3</sup>Structural Biology Group, Max Planck Institute of Molecular Physiology, Dortmund, Germany; and <sup>4</sup>Structural Biology of Cilia, CR-UK Beatson Institute, Glasgow, United Kingdom

**ABSTRACT** The small GTP-binding proteins Arl2 and Arl3, which are close homologs, share a number of interacting partners and act as displacement factors for prenylated and myristoylated cargo. Nevertheless, both proteins have distinct biological functions. Whereas Arl3 is considered a ciliary protein, Arl2 has been reported to be involved in tubulin folding, mitochondrial function, and Ras signaling. How these different roles are attained by the two homolog proteins is not fully understood. Recently, we showed that the N-terminal amphipathic helix of Arl3, but not that of Arl2, regulates the release of myristoylated ciliary proteins from the GDI-like solubilizing factor UNC119a/b. In the biophysical study presented here, both proteins are shown to exhibit a preferential localization and clustering in liquid-disordered domains of phase-separated membranes. However, the membrane interaction behavior differs significantly between both proteins with regard to their nucleotide loading. Whereas Arl3 and other Arf proteins with an N-terminal amphipathic helix require GTP loading for the interaction with membranes, Arl2 binds to membranes in a nucleotide-independent manner. In contrast to Arl2, the N-terminal helix of Arl3 increases the binding affinity to UNC119a. Furthermore, UNC119a impedes membrane binding of Arl3, but not of Arl2. Taken together, these results suggest an interplay among the nucleotide status of Arl3, the location of the N-terminal helix, membrane fluidity and binding, and the release of lipid modified cargos from carriers such as UNC119a. Since a specific Arl3-GEF is postulated to reside inside cilia, the N-terminal helix of Arl3•GTP would be available for allosteric regulation of UNC119a cargo release only inside cilia.

## INTRODUCTION

ADP-ribosylation factor-like (Arl) proteins belong to the Arf subfamily of small GTP-binding proteins (for a review on Arl proteins, see Gillingham and Munro (1)). As expected from their high sequence identity (50%), the small G-proteins Arl2 and Arl3 share several effector-type interacting partners, including Bart (2), the GDI-like solubilizing factors UNC119a and UNC119b (3–5), and the delta subunit of type 6 phosphodiesterase (PDE $\delta$ ) (6–8). Despite their homology and shared downstream effectors, Arl2 and Arl3 seem to have nonredundant interactions and cellular functions. The GTPase-activating protein (GAP) RP2 has been shown to be specific for Arl3 (9), whereas Arl2 is apparently downregulated by the specific GAP ELMOD3 (10). Arl3 is found exclusively in ciliated organisms and considered as a ciliary protein, with Arl3 knockout mice showing phenotypes similar to ciliopathies, including renal, pancreatic, and retinal defects (11,12). Arl2, on the other hand, has been shown to be involved in the tubulin-folding pathway (13). Furthermore, knockdown by small interfering RNA and/or the introduction of GTPase-nega-

tive mutants of Arl2/3 have been shown to have different effects on mammalian cell lines (14,15). In addition, Arl2 has been implicated in the regulation of mitochondrial function (15).

Arl proteins are structurally related to Arf proteins, which exhibit a unique and common structural feature: a two-residue shift in the  $\beta 2$  and  $\beta 3$  strands (termed the interswitch toggle) of the GDP-bound state relative to other GDP-bound small G-proteins (16). In the GDP-bound state, the N-terminal amphipathic helix is located in a hydrophobic pocket on the protein surface and caps the interswitch. Upon binding to GTP, the two  $\beta$  strands connecting the nucleotide-sensitive switch 1 and 2 regions (i.e., the  $\beta 2$  and  $\beta 3$  strands) undergo a two-residue register shift, leading to an exposed conformation of this interswitch in the GTP-loaded state and thus an exposed N-terminal helix, because the interswitch toggle requires the displacement of the N-terminal amphipathic helix from the surface of the protein (16,17). Hence, this amphipathic helix, which carries an N-terminal myristoyl group in several Arf proteins, is only exposed in Arf•GTP and is believed to bind to membranes (18), thereby connecting the membrane binding capacity of Arf to its nucleotide status. Therefore, the N-terminal helix can be considered as part of the switch regions. Arl2 and Arl3 also possess a short amphipathic N-terminal helix and have been shown to undergo the same type of structural

Submitted March 24, 2015, and accepted for publication August 10, 2015.

\*Correspondence: [katrin.weise@tu-dortmund.de](mailto:katrin.weise@tu-dortmund.de) or [alfred.wittinghofer@mpi-dortmund.mpg.de](mailto:alfred.wittinghofer@mpi-dortmund.mpg.de)

Shobhna Kapoor and Eyad K. Fansa contributed equally to this work.

Editor: Heiko Heerklotz.

© 2015 by the Biophysical Society  
0006-3495/15/10/1619/11

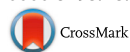

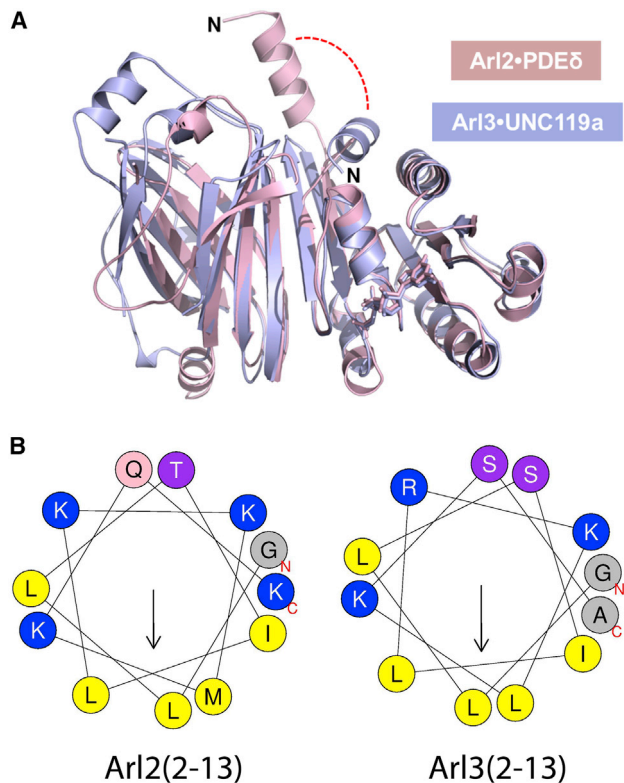

**FIGURE 1** (A) Ribbon representation of the overall structure of full-length Arl2 and Arl3 illustrating the conformational change of the N-terminal helix with regard to the different interaction of the N-terminus of Arl2 and Arl3 with effectors such as PDE $\delta$  and UNC119a (PDB codes: 1K5J and 4GOJ, respectively). (B) Helical wheel projection of the N-terminal amphipathic helix of Arl2 and Arl3 (amino acid residues 2–13). Positively charged residues (K and R), glutamine (Q), serine (S) and threonine (T), as well as hydrophobic residues (L, M, and I) and alanine (A) and glycine (G) are indicated in color accordingly. The arrow corresponds to the hydrophobic moment. The helical wheel projection was generated using the program HELIQUEST (23). To see this figure in color, go online.

transition (Fig. 1). However, despite the presence of a conserved glycine at position 2 of the NH<sub>2</sub>-terminus (the *N*-myristoylation site in Arf proteins), they have not been shown to be myristoylated (1,19). Thus, if membrane binding of Arl2 and Arl3 takes place, it is expected to be mediated only by the amphipathic helix, as in the case of the Arf-related protein Sar1, where the amphipathic helix has been shown to be sufficient for membrane binding (20,21).

Arl2 and Arl3 serve as displacement factors for lipid-modified proteins bound to the GDI-like solubilizing factors UNC119a, UNC119b, and PDE $\delta$  (4,7,22). Recently, we showed structurally and biochemically that Arl3, but not Arl2, regulates the release of myristoylated ciliary proteins from UNC119a and UNC119b (4). The allosteric displacement is mediated by the N-terminal helix of Arl3, suggesting a difference in the (dynamic) properties of the Arl2 and Arl3 N-terminal helices. Since this amphipathic helix is predicted to mediate Arl2 and Arl3 membrane binding, we hypothesized that Arl2 and Arl3 might have different

membrane interaction properties that could account for the differences in their cellular localization and functions. So far, however, information about the targeting of Arl2 and Arl3 to different membrane compartments is scarce.

In this study, we analyzed the role of the N-terminal amphipathic helix of Arl2/3 in membrane binding and its influence on complexation with UNC119a to further investigate the differences between Arl2 and Arl3. For this purpose, we utilized surface plasmon resonance (SPR), infrared reflection absorption spectroscopy (IRRAS), fluorescence-based kinetic analysis, and atomic force microscopy (AFM). The combined data verify the requirement of the N-terminal amphipathic helix for membrane binding of Arl2/3 and their interaction with UNC119a. Surprisingly, and in contrast to what was found for other Arf family members, a nucleotide-independent membrane interaction was detected for Arl2. The results demonstrated the necessity of GTP binding and the N-terminal helix for Arl3 membrane binding. Moreover, the N-terminal helix of Arl3, but not that of Arl2, strongly increased the binding affinity to UNC119a. Finally, a GTP-specific binding of UNC119a to Arl3 was revealed, with binding of UNC119a preventing membrane binding of Arl3 in the UNC119a-complexed state owing to the unavailable amphipathic helix.

## MATERIALS AND METHODS

### Materials and sample preparation

The phospholipids 1,2-dioleoyl-*sn*-glycero-3-phosphocholine (DOPC), 1,2-dioleoyl-*sn*-glycero-3-phospho-(1'-*rac*-glycerol) sodium salt (DOPG), 1,2-dipalmitoyl-*sn*-glycero-3-phospho-(1'-*rac*-glycerol) sodium salt (DPPG), and 1,2-dipalmitoyl-*sn*-glycero-3-phosphocholine (DPPC) were purchased from Avanti Polar Lipids (Alabaster, AL). Cholesterol (Chol) and 4-(2-hydroxyethyl)piperazine-1-ethanesulfonic acid (Hepes) were obtained from Sigma Aldrich (Deisenhofen, Germany). Magnesium chloride, tris(hydroxymethyl)aminomethane (Tris), and chloroform were obtained from Merck (Darmstadt, Germany). Bovine serum albumin was obtained from Pierce (Bonn, Germany). Stock solutions of 10 mg mL<sup>-1</sup> lipid (DOPC, DOPG, DPPC, DPPG, and Chol) in chloroform/methanol 4:1 for DPPG and in chloroform for all other lipids were prepared and mixed to obtain 1.94 mg of total lipid with the desired composition of DOPC/DOPG/DPPC/DPPG/Chol 20:5:45:5:25 for AFM and SPR experiments. After removal of the solvent by drying under vacuum overnight, the dry lipids were resuspended in 1 mL of 10 mM Hepes, 5 mM MgCl<sub>2</sub>, 150 mM NaCl, pH 7.5 for SPR, or 25 mM Tris, 5 mM MgCl<sub>2</sub>, 150 mM NaCl, pH 7.5 for the AFM experiments to yield a total lipid concentration of 3 mM. Details regarding the formation of large unilamellar vesicles (100 nm in size) by extrusion can be found in Weise et al. (24,25). The extruded lipid solution was further diluted to a concentration of 0.5 mM for the SPR experiments.

### Protein production and purification

UNC119a, C-terminal His-tagged full-length Arl2 and Arl3, and GST-tagged, N-terminal truncated Arl2 and Arl3 were produced and purified as described previously (5,9,26). After purification, both proteins were bound to GDP as detected by high-performance liquid chromatography. Exchange for the nonhydrolyzable GTP analog (GppNHp) was carried out as described previously (9).

## SPR

SPR experiments were carried out with a Biacore 3000 system (Biacore (now GE Healthcare), Uppsala, Sweden). For protein-membrane interaction studies, the L1 sensor chip (GE Healthcare, Munich, Germany) was used. All measurements were performed at a temperature of 25°C, and samples were cooled at 10°C in the autosampler before the measurements were started. Sample preparation, vesicle immobilization, SPR measurements, regeneration of the chip surface, and analysis of the SPR sensorgrams were carried out as described previously (27) and in [Supporting Materials and Methods](#) in the [Supporting Material](#). Briefly, 15  $\mu\text{L}$  of the extruded lipid vesicle solution (0.5 mM) was injected twice at a flow rate of 2  $\mu\text{L}/\text{min}$  for vesicle immobilization. This was followed by a stabilization phase with injection of 50  $\mu\text{L}$  of Hepes buffer at a flow rate of 100  $\mu\text{L}/\text{min}$  and three further injections of 10  $\mu\text{L}$  of 25 mM NaOH at a flow rate of 5  $\mu\text{L}/\text{min}$ . Finally, the lipid surface was stabilized by injecting 40  $\mu\text{L}$  Hepes buffer at a flow rate of 20  $\mu\text{L}/\text{min}$ . After baseline stabilization, 40  $\mu\text{L}$  of the protein-containing solution ( $c_{\text{Arl}} = 2 \mu\text{M}$ ,  $c_{\text{UNC119a}} = 3 \mu\text{M}$ ) was injected at a flow rate of 20  $\mu\text{L}/\text{min}$  and the dissociation was followed for 30 min. For membrane interaction studies with the UNC119a-complexed Arl, both proteins were mixed before injection into the SPR flow cell to yield a final concentration of 2  $\mu\text{M}$  Arl and 3  $\mu\text{M}$  UNC119a. The degree of chip surface coverage with lipids was determined with the use of 0.5  $\mu\text{M}$  of bovine serum albumin and was found to be  $\geq 75\%$  in all cases (cf. Weise et al. (27)). For the curve-fitting procedure, BIAevaluation software 4.1 (Biacore) and Origin 7 (OriginLab, Northampton, MA) were used.

## IRRAS

Experiments were carried out on an IRRAS setup consisting of two linked Teflon troughs and a Vertex 70 FT-IR spectrometer connected to an A511 reflection attachment (both Bruker, Mannheim, Germany) with an MCT detector. The measurements, setup, sample preparation, and spectra analysis were performed as described previously (25,27). The temperature of the subphase was maintained at 20°C  $\pm$  0.5°C and time-dependent measurements were performed in the small (reference) trough at constant surface area. The resulting curve of surface pressure versus time is referred to as the  $\pi/t$  isotherm. Both troughs were filled with 25 mM Tris, 5 mM  $\text{MgCl}_2$ , 150 mM NaCl, pH 7.5. Monolayers of DOPC/DOPG/DPPC/DPPG/Chol 20:5:45:5:25 (mol %) were formed by directly spreading the lipid solution (1 mM) in a mixture of chloroform and methanol (3:1) onto the subphase. Protein adsorption measurements were carried out by injecting the protein solution into the aqueous subphase below the lipid monolayer to yield concentrations of Arl and UNC119a of 200 and 300 nM, respectively.

## AFM

Preparation of the supported lipid bilayers and the AFM setup have been described in detail elsewhere (24,25). Briefly, vesicle fusion on mica was carried out by depositing 35  $\mu\text{L}$  of the extruded lipid vesicle solution together with 35  $\mu\text{L}$  of Tris buffer on freshly cleaved mica (NanoAndMore, Wetzlar, Germany) and incubating the solution in a wet chamber at 70°C for 2 h. For protein-membrane interaction studies, 200  $\mu\text{L}$  of either Arl2/3•GDP, Arl2/3•GppNHp, or  $\Delta\text{Arl2/3}\bullet\text{GppNHp}$  (2 or 5  $\mu\text{M}$ ) in 25 mM Tris, 5 mM  $\text{MgCl}_2$ , 150 mM NaCl, pH 7.5 were injected into the AFM fluid cell at room temperature and allowed to incubate for 1 h. Measurements were performed on a MultiMode scanning probe microscope equipped with a NanoScope IIIa controller (Digital Instruments (now Bruker), Santa Barbara, CA) and a J-Scanner (scan size 125  $\mu\text{m}$ ). Images were obtained by applying the tapping mode in liquid with sharp nitride lever probes mounted in a fluid cell (MTFML; both from Veeco (now Bruker)). Tips with nominal force constants of 0.24 N  $\text{m}^{-1}$  were used at driving frequencies of  $\sim 9$  kHz and drive amplitudes between 170 and 700 mV. The scan frequencies were

between 0.75 and 2.0 Hz. Images with a resolution of 512  $\times$  512 pixels were analyzed using the image analysis and processing software NanoScope version 5 (Veeco (now Bruker)) and Origin 7 (OriginLab).

## Fluorescence-based kinetic measurements

Kinetic measurements were monitored by means of a stopped-flow apparatus (Applied Photophysics) in the polarization mode. Experiments were performed at 20°C in a buffer containing 25 mM Tris-HCl (pH 7.5), 50 mM NaCl, and 3 mM DTE, using an excitation wavelength of 366 nm and a 420 nm cutoff filter for mantGppNHp-bound Arl proteins. Data were analyzed using the GraFit 5.0 program (Erithacus Software).

## RESULTS AND DISCUSSION

### Membrane interaction of Arl3

Ciliary membranes form specialized compartments of the plasma membrane of eukaryotic cells with peculiar biophysical properties and compositions. They were reported to have different lipid and protein compositions compared with periciliary and cell-body membranes, being highly enriched in cholesterol and sphingolipids (28,29). This led to the assumption that cilia might be enriched in lipid raft microdomains and thus be more ordered than the bulk plasma membrane (29). In this study, we used an anionic model raft membrane system that consisted of DOPC/DOPG/DPPC/DPPG/Chol at a molar ratio of 20:5:45:5:25 and was segregated into liquid-ordered ( $l_o$ ) and liquid-disordered ( $l_d$ ) domains under ambient conditions, thus mimicking a heterogeneous plasma membrane with different degrees of membrane order (30). In addition, the integration of anionic lipids took the positive net charge of the amphipathic helices of Arl2 and Arl3 into account (+4 and +3, respectively). Phosphatidylglycerol (PG) is widely used as a simplified model of negatively charged phospholipids that mimic the electrostatic effects of monovalent acidic lipids present in mammalian membranes. Previous studies on small GTPases, such as Ras, revealed a membrane interaction behavior that is independent of the heterogeneous membrane composition (31), justifying the use of the low-melting-point lipid DOPC in liquid-phase coexistence model systems, though DOPC is rare in mammalian membranes.

To analyze the membrane binding kinetics of full-length Arl3 in the inactive (Arl3•GDP) and active (Arl3•GppNHp as a nonhydrolyzable GTP analog) states, as well as truncated Arl3 ( $\Delta\text{Arl3}$ , i.e., without the N-terminal residues 1–16), we carried out SPR measurements. The resulting sensorgrams (Fig. 2 A) indicate that the maximum surface coverage of the lipid bilayer (which was immobilized on a lipophilic modified dextran matrix of a L1 sensor chip) with the different Arl3 proteins is on the order of 50–300 resonance units (1 RU = 1 pg  $\text{mm}^{-2}$ ). From SPR sensorgrams, one can quantify the membrane interaction of proteins by determining three representative parameters: 1) the initial binding rate (slope) of the association phase,

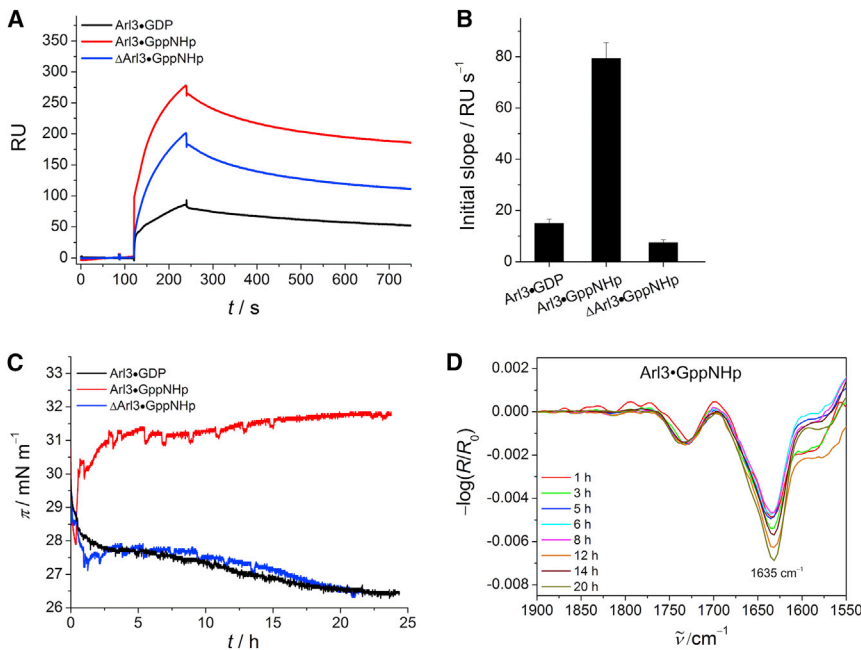

**FIGURE 2** Membrane interaction of GDP- and GppNHp-loaded full-length and GppNHp-bound truncated Arl3. (A) SPR sensorgrams of the binding of Arl3 ( $c = 2 \mu\text{M}$ ) to anionic model raft membranes composed of DOPC/DOPG/DPPC/DPPG/Chol 20:5:45:5:25 (mol %). (B) Corresponding SPR data for the initial association process. The error bars represent the standard deviation from three to six measurements. (C) Surface pressure/time isotherms for the membrane interaction of Arl3 with anionic lipid raft monolayers. (D) Corresponding time-dependent IRRA spectra for the amide-I' region of membrane-bound Arl3•GppNHp. All IRRA spectra were recorded with p-polarized light at a  $35^\circ$  angle of incidence because the use of p-polarized light resulted in larger signals and better signal/noise ratios (cf. Fig. S2). To see this figure in color, go online.

which allows a comparison of the incipient affinities of the proteins to lipid membranes; 2) the average dissociation rate constant,  $\bar{k}_{\text{diss}}$ , which quantifies the overall dissociation rate of the protein from the lipid membrane; and 3) the relative amount of quasi-irreversibly bound protein at the end of each dissociation phase, which reflects the ability of the protein to stably insert into the lipid membrane (27). Because subsequent AFM experiments showed a clustering of Arl proteins in heterogeneous membranes (see below), we applied a two-step reaction model to analyze the association and dissociation phases of the protein-membrane interaction process (27) (Supporting Materials and Methods; Fig. S1; Tables S1–S3).

Our analysis of the membrane association of the different proteins reveals that the initial slope of Arl3•GppNHp differs significantly from that of Arl3•GDP and  $\Delta\text{Arl3}\bullet\text{GppNHp}$  (Fig. 2 B). It indicates a higher binding rate of Arl3•GppNHp, which is most likely due to the exposed N-terminal helix in the active state. The detected incipient membrane affinity of the inactive Arl3 is weak, as would be expected considering that the N-terminal region of Arl3•GDP is located in a hydrophobic pocket on the surface of the G domain. This conclusion is supported by results obtained using the truncated form of Arl3, which also showed a lower membrane binding rate even in the GppNHp-bound state. For comparison, a membrane binding affinity on the order of  $10^5 \text{ M}^{-1}$  was reported for Sar1 ( $K_D = 10.5 \mu\text{M}$ ) (32).

Because of the nonsimple-exponential association and dissociation curves and the observed membrane interaction behavior, analysis of the SPR sensorgrams was quite complex. To facilitate interpretation, we employed IRRA spectroscopy to study the membrane binding of Arl3 in its

different states by simultaneously following the IRRA spectra and surface pressure/time ( $\pi/t$ ) isotherms. We injected proteins underneath the lipid monolayer at a surface pressure of  $\sim 28\text{--}30 \text{ mN m}^{-1}$ , which reflects the physiological lipid density found in lipid membranes. The  $\pi/t$  profiles in Fig. 2 C show an effective insertion into the anionic lipid raft monolayer for Arl3•GppNHp only, as indicated by a significant increase ( $\sim 4 \text{ mN m}^{-1}$ ) in surface pressure. No membrane insertion was observed for  $\Delta\text{Arl3}\bullet\text{GppNHp}$ , supporting the finding that membrane binding of Arl3 in the GTP-bound state is mediated by the N-terminal amphipathic helix. Arl3•GDP also did not display any membrane insertion, confirming that the nucleotide status plays a regulatory role by modulating the membrane interaction of Arl3 through the availability of the amphipathic helix for membrane binding.

The surface pressure data are accompanied by the corresponding IRRA spectra in Fig. 2, where detection of the infrared signature of the protein signifies the presence of membrane-bound protein at the lipid interface. In particular, the amide-I' band of Arl3•GppNHp showed a maximum around  $1635 \text{ cm}^{-1}$  in the IRRA spectra (which is typical for  $\alpha/\beta$  proteins) that remained constant over time, implying a relatively stable conformation/orientation of the membrane-bound Arl3•GppNHp (Fig. 2 D). The observed absence of an amide-I' band in the IRRA spectra of Arl3•GDP and  $\Delta\text{Arl3}\bullet\text{GppNHp}$  strongly suggests a very weak membrane binding for these two proteins.

## Membrane interaction of Arl2

To compare the membrane binding behavior of Arl2 and Arl3, we carried out analogous SPR measurements for

Arl2. The resulting sensorgrams of Arl2 in the inactive (Arl2•GDP), active (Arl2•GppNHp), and truncated ( $\Delta$ Arl2•GppNHp, i.e., missing residues 1–16) states are given in Fig. 3 A. Surprisingly, the analysis reveals similar initial binding rates for Arl2•GDP and Arl2•GppNHp (Fig. 3 B). This is in contrast to Arl3, although the incipient membrane affinities of both Arl2 proteins are considerably lower than that of Arl3•GppNHp (cf. Fig. 2 B).

The SPR results are in agreement with the corresponding IRRAS experiments, where no nucleotide-dependent membrane insertion could be detected for Arl2 (Fig. 3, C–E). The surface pressure/time isotherms show a significant membrane insertion for both nucleotide states, with a slightly larger increase in surface pressure for Arl2•GppNHp ( $\Delta\pi \approx 5 \text{ mN m}^{-1}$ ) compared with Arl2•GDP ( $\Delta\pi \approx 4 \text{ mN m}^{-1}$ ; Fig. 3 C). The finding of a comparable membrane interaction behavior for active and inactive Arl2 is further supported by the detection of an amide-I' band for both GDP- and GppNHp-loaded Arl2 in the IRRAS spectra, contrary to Arl3. The wavenumber for the amide-I' band of membrane-bound Arl2•GppNHp shows a time-dependent shift from 1646 to 1634  $\text{cm}^{-1}$ , implying orientational changes (Fig. 3 E). Arl2•GDP exhibits a small random shift in wavenumber for the time-dependent amide-I' band. However, this is not significant due to the resolution in IRRAS of  $\sim 4 \text{ cm}^{-1}$  (Fig. 3 D). Hampering of the membrane insertion by truncation of the N-terminal helix in Arl2•GppNHp reveals that membrane binding of active Arl2 is still mainly

mediated by the N-terminal amphipathic helix, as indicated by the lack of an amide-I' band in the IRRAS spectra of  $\Delta$ Arl2•GppNHp and the missing increase in surface pressure (Fig. 3 C). Taken together, these results show that although the G domains and in particular the N-terminal helices of Arl2 and Arl3 are similar, they behave rather differently in their nucleotide-dependent interaction with membranes, which seems to indicate a different dynamic behavior rather than a different structure of the N-terminus. Thus, the N-terminal helix of Arl2 might even be flexible and exposed in the GDP-loaded state to mediate an interaction with the membrane.

### Partitioning of Arl2/3 in heterogeneous membranes

By using AFM, we were able to gain detailed insights into the partitioning behavior of Arl3 and Arl2 in membranes of varying degrees of order. AFM images of the protein-free anionic lipid raft model membrane system indicate phase separation into  $l_d$  and  $l_o$  membrane domains under ambient conditions (cf. Fig. S3). The coexisting  $l_d/l_o$  phases can be clearly distinguished by a height difference of  $\sim 1 \text{ nm}$  (30). After incubation of the membrane with Arl3•GDP, only a few protein-enriched domains could be detected in a disturbed  $l_d$  phase, even at a higher protein concentration ( $5 \mu\text{M}$ ; Fig. 4). A comparable membrane interaction behavior was observed for  $\Delta$ Arl3•GppNHp, i.e., only a few proteins were visible in a

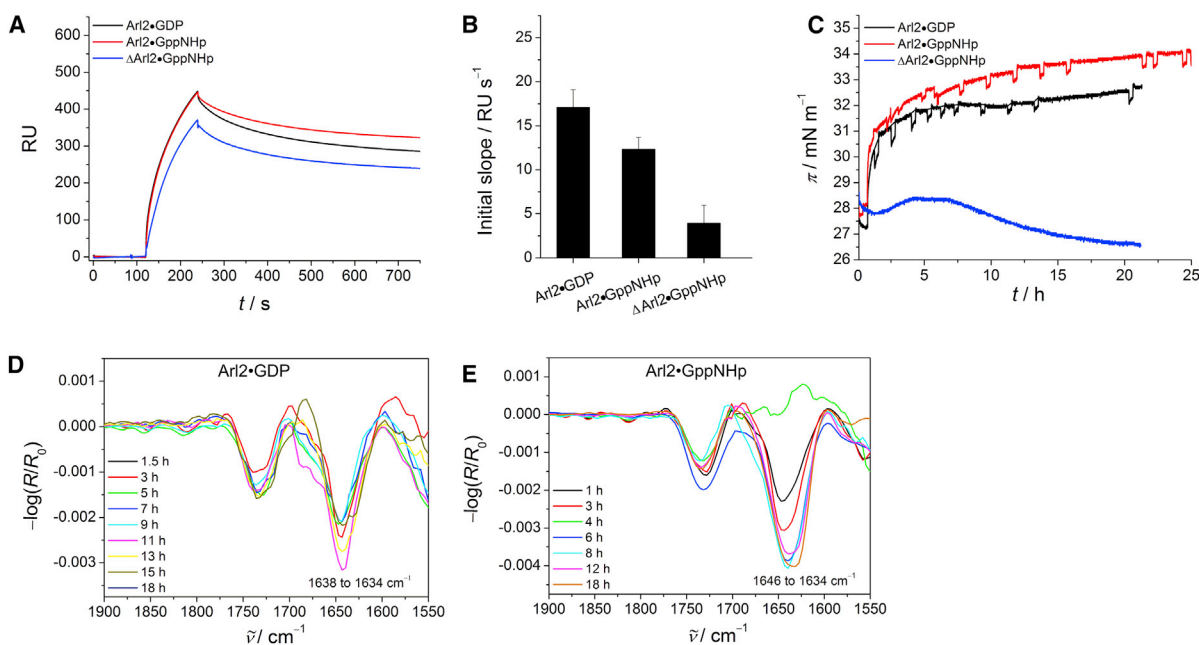

FIGURE 3 Membrane interaction of GDP- and GppNHp-loaded full-length and GppNHp-bound truncated Arl2. (A) SPR sensorgrams of the binding of Arl2 ( $c = 2 \mu\text{M}$ ) to anionic model raft membranes composed of DOPC/DOPG/DPPC/DPPG/Chol 20:5:45:5:25 (mol %). (B) Corresponding SPR data for the initial association process. The error bars represent the standard deviation from three to five measurements. (C) Surface pressure/time isotherms for the membrane interaction of Arl2 with anionic lipid raft monolayers. (D and E) Corresponding time-dependent IRRAS spectra for the amide-I' region of membrane-bound Arl2•GDP (D) and Arl2•GppNHp (E). All IRRAS spectra were recorded with p-polarized light at a  $35^\circ$  angle of incidence. To see this figure in color, go online.

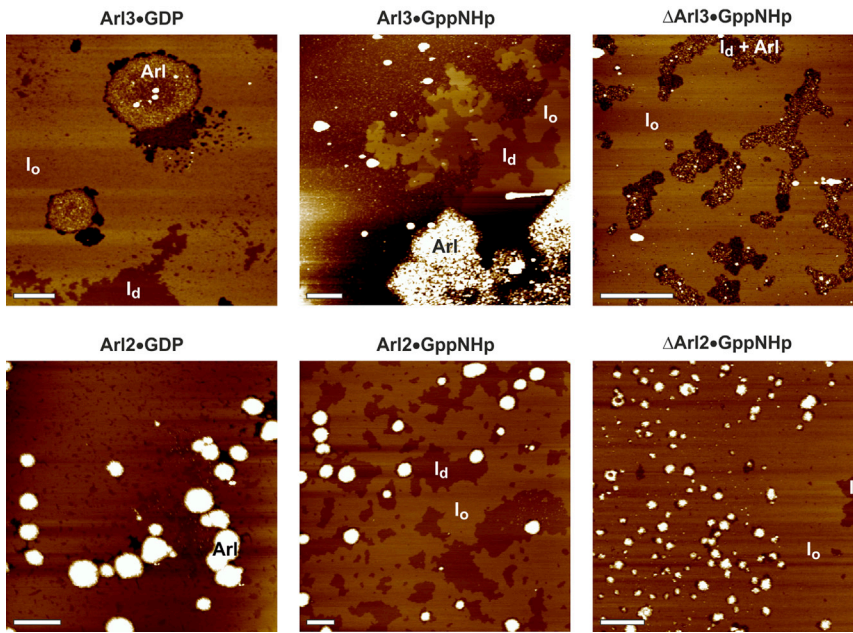

**FIGURE 4** Membrane partitioning of full-length and truncated Arl2/3 in the different nucleotide-bound states. All AFM images showed a defect-free, continuous lipid bilayer on mica with isolated liquid-disordered ( $l_d$ ) domains in a liquid-ordered ( $l_o$ ) membrane matrix at room temperature before injection of proteins (cf. Fig. S3). Representative AFM images after the addition of Arl2/3•GDP, Arl2/3•GppNHp, and  $\Delta$ Arl2/3•GppNHp to a membrane consisting of DOPC/DOPG/DPPC/DPPG/Chol 20:5:45:5:25 (mol %) are shown. The overall height of the vertical color scale corresponds to 6 nm for Arl3•GDP,  $\Delta$ Arl3•GppNHp, and  $\Delta$ Arl2•GppNHp, and 12 nm for Arl3•GppNHp, Arl2•GppNHp, and Arl2•GDP. The scale bar represents 1  $\mu$ m for all images. To see this figure in color, go online.

thinned  $l_d$  phase and there were almost no protein-enriched domains. In contrast to the relatively weak membrane interaction of inactive and truncated Arl3, a strong clustering of Arl3•GppNHp ( $c = 2 \mu$ M) was detected in a perturbed  $l_d$  phase, as indicated by the large amount of huge protein-enriched domains in the AFM image (Fig. 4, white areas). In addition, the pronounced insertion of Arl3•GppNHp into the membrane leads to a significant disturbance and thinning of the  $l_d$  phase. Insertion of positively charged amphipathic helices into membranes often leads to membrane thinning, which can be due to hydrophobic mismatch, interfacial localization of the basic residues that would result in an increase of the lipid headgroup distance, or a pushing down of the lipid headgroups in the vicinity of the membrane-inserted protein.

A possible explanation for the strong protein clustering observed for Arl3•GppNHp is that the N-terminal amphipathic helix is only exposed in the active state of Arl3. Hence, insertion of the positively charged helix (+3) into the negatively charged membrane (as indicated by IRRAS) could lead to an accumulation of anionic lipids at the protein-binding site. Sequestering of acidic lipids by membrane-bound basic peptides is known to result in attractive interactions between membrane-bound proteins. A comparable lipid-sorting mechanism that is controlled by electrostatic interactions has been proposed for the clustering of the small GTPase K-Ras4B in  $l_d$  domains of heterogeneous membranes (25). Even though the N-terminal helix is not available for membrane binding in  $\Delta$ Arl3•GppNHp and Arl3•GDP (as shown by IRRAS), membrane adsorption can still occur through interactions with the Arl protein surface, although it is much less pronounced (as seen in AFM and SPR).

When the membrane partitioning of Arl3 is compared with that of Arl2, it becomes apparent that the membrane

interaction of Arl2•GDP and Arl2•GppNHp is much more pronounced than that of Arl3•GDP. This is evident from the larger amount and size of protein-enriched domains in the AFM images (Fig. 4, white areas) even at a protein concentration of 2  $\mu$ M. However, just like Arl3, Arl2 partitions into the  $l_d$  phase, which leads to a disturbance of the membrane when large protein clusters are formed. Deletion of the N-terminus of Arl2•GppNHp results in a diminished membrane interaction, as indicated by a significantly lower amount of protein-enriched domains that are also much smaller in size.

Taken together, the data indicate the same kind of membrane partitioning for all Arl3 and Arl2 proteins, with the strongest membrane binding and clustering occurring for active Arl3, in accordance with the SPR and IRRAS results. In addition, the data also agree in showing a nucleotide-dependent membrane interaction for Arl3, but not Arl2, and in emphasizing the significance of the N-terminal amphipathic helix for the membrane binding process. Moreover, the data reveal that Arl2 and Arl3 partition preferentially into less-ordered domains of heterogeneous, anionic membranes. This is in accord with a previous report showing that the N-terminal helix of Arf1•GTP does not favor ordered lipid domains (33), strengthening the assumption that Arl3•GTP may not be able to bind to more ordered ciliary membranes.

### Role of the N-terminal helix in the interaction of Arl2/3 with UNC119a

Arl proteins serve as GDI-like displacement factors for cargo bound to the shuttle factors PDE $\delta$  and UNC119. To ascertain whether the N-termini of Arl2 and Arl3 have an

effect on the interaction with UNC119a, and if so, how it affects the membrane interaction, we first determined the affinities of full-length and truncated Arl2/3 for UNC119a using kinetic measurements (Fig. 5). We measured the association rate constants of the interactions via stopped-flow experiments using pseudo-first-order conditions. The second-order rate constants,  $k_{\text{on}}$ , obtained from these data are on the order of  $2.8\text{--}5.3 \times 10^6 \text{ M}^{-1} \text{ s}^{-1}$ , are somewhat higher for Arl3 than for Arl2, and are not dependent on the presence of the N-terminus (Fig. 5, A and B). The dissociation rate constants,  $k_{\text{off}}$ , are very similar for full-length and truncated Arl2, as well as for truncated Arl3, on the order of  $1 \text{ s}^{-1}$ . However, full-length Arl3 shows a dramatic difference, with a  $k_{\text{off}}$  of  $0.034 \text{ s}^{-1}$  (Fig. 5, C–E). Using the kinetic

rate constants to determine the equilibrium dissociation constants (Fig. 5 F), we find that binding of full-length Arl3 to UNC119a ( $7 \text{ nM}$ ) is  $\sim 25$ -fold higher than that of full-length Arl2 ( $0.18 \mu\text{M}$ ). The N-terminus is a major determinant of this higher affinity and its deletion decreases the affinity by 27-fold ( $0.19 \mu\text{M}$ ), whereas it decreases Arl2's affinity by only 3-fold ( $0.48 \mu\text{M}$ ). The affinities determined here are different from those determined earlier by an equilibrium method (5), which is less accurate for such high-affinity interactions. The results achieved here are similar to those obtained for the interaction of Arl2/3 with PDE $\delta$ , where we also found a higher affinity for Arl3 and a strong dependence on the presence of the N-terminus for Arl3 only (E.K.F. and A.W., unpublished data).

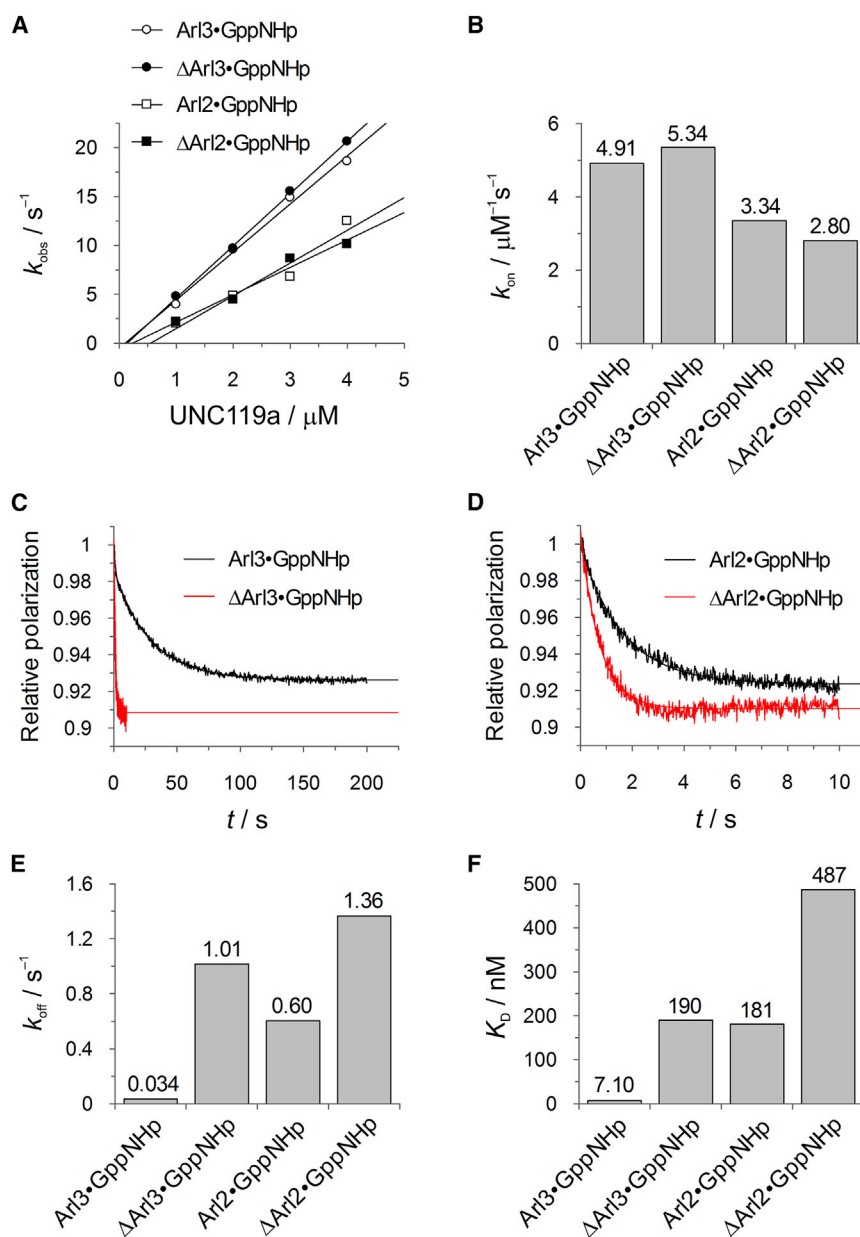

FIGURE 5 Influence of the Arl3 N-terminal helix on UNC119a binding. (A) Stopped-flow fluorescence polarization kinetic measurements of the association of  $0.2 \mu\text{M}$  mantGppNHp-loaded Arl proteins with increasing concentrations of UNC119a. The pseudo-first-order rate constants ( $k_{\text{obs}}$ ) thus obtained are plotted against the concentration of UNC119a. (B) Bar charts of the second-order association rate constants ( $k_{\text{on}}$ ) determined from the data given in (A). (C and D) In stopped-flow fluorescence polarization kinetic experiments, complexes of  $2 \mu\text{M}$  UNC119a with  $0.2 \mu\text{M}$  of mantGppNHp-loaded Arl proteins were mixed with a 200-fold excess of unlabeled Arl proteins to determine  $k_{\text{off}}$  as indicated. (E) Bar charts of the dissociation rate constants ( $k_{\text{off}}$ ) determined in (C) and (D). (F) Equilibrium dissociation constants ( $K_D$ ) of Arl protein complexes with UNC119a as determined from the kinetic constants in (A)–(E) using  $k_{\text{off}}/k_{\text{on}}$ . To see this figure in color, go online.

### Influence of UNC119a on the membrane interaction of Arl2 and Arl3

Recently, we showed that the N-terminal helix of Arl3, but not that of Arl2, mediates the allosteric regulation of cargo binding to UNC119a (4). By solving the x-ray structure of the UNC119-Arl3•GppNHp complex, we showed that the N-terminal helix is not detached, as in other Arf/Arl effector complexes (e.g., the Arl2-PDE $\delta$  complex (5)), but is retained on the G domain (Fig. 1) (4). Hence, the N-terminal helix seems to be involved in the interaction between Arl3 and UNC119a, but not in the interaction between Arl2 and UNC119a. Based on these findings, we would expect UNC119a binding to Arl3 or Arl2 to have different effects on the interaction of Arl2/3 with membranes. To test this assumption, we performed SPR and IRRAS experiments as described above for Arl2 and Arl3 in the presence of UNC119a. To achieve complex formation of Arl3 or Arl2 and UNC119a, we premixed Arl2/3 and UNC119a in bulk solution and then injected this solution across the lipid bilayer surface in the SPR flow cell or underneath the lipid monolayer in the IRRAS experiments.

As indicated by the SPR data, UNC119a significantly reduced the initial membrane association rate of Arl3•GppNHp, but not that of Arl3•GDP (Figs. 2 B and 6, A and B). This would be in agreement with a GTP-specific binding of UNC119a to Arl3, with binding of UNC119a preventing membrane binding of Arl3 in the complexed state owing to the fixed position of the amphipathic helix. This is in line with the finding that the amount of quasi-irreversibly bound protein and thus stable membrane binding were significantly reduced by UNC119a for Arl3•GppNHp only (cf. Tables S2 and S3). On the other hand, no substantial nucleotide-dependent effect of UNC119a on the membrane association of Arl2 could be detected. In both the GDP- and GTP-bound states, the membrane association rate was slightly increased by the presence of UNC119a (Figs. 2 B and 6 B). For Arl2•GppNHp, this supports a previous structural analysis indicating that in the Arl2-effector complexes, the N-terminal helix is pointing into solution and thus would be available for membrane insertion (4).

In corresponding IRRAS experiments, UNC119a itself did not show an insertion into the membrane. However, it seemed to weakly interact with and perturb the membrane, possibly via lipid headgroup interactions. The absence of an amide-I' band strongly suggests a rather weak membrane binding for UNC119a (cf. Fig. S4). As expected, the membrane binding capacity of the N-terminal helix of Arl3•GppNHp was highly compromised in complex with UNC119a, leading to a reduced membrane insertion of Arl3•GppNHp in complex with UNC119a (~75% reduction,  $\Delta\pi \sim 0.9 \text{ mN m}^{-1}$ ; Figs. 2 C and 6 C). Furthermore, the measured amide-I' band intensity of UNC119a-complexed Arl3•GppNHp was 4-fold lower, indicating a lower amount of membrane-bound protein (Fig. 6 D). These re-

sults confirm the importance of the Arl3 N-terminal helix in regulating cargo release from UNC119a and in binding to membranes. This is in sharp contrast to the behavior of Arl2, where the N-terminal helix is involved in binding to membranes independently of the nucleotide state of the protein, but is not competent to allosterically regulate ciliary cargo release from UNC119a (4). Complex formation with UNC119a did not significantly alter the membrane binding behavior of Arl2 proteins in the different nucleotide-bound states (Fig. 6 C), suggesting that the N-terminal helix is not involved in the interaction between Arl2 and UNC119a. Finally, the appearance of the amide-I' band shoulder centered around  $1628/29 \text{ cm}^{-1}$  (which is typical for proteins with predominantly  $\beta$ -sheet structures, such as UNC119a) with time for both complexes suggests the presence of UNC119a at the membrane along with Arl2•GppNHp/GDP (Fig. 6, E and F), also pointing toward different and mutually exclusive signals for an interaction of Arl2 with UNC119a and membranes. Although the interaction of Arl2 with UNC119a is GTP-specific in solution (5), the combined data of this study show that the membrane interaction of Arl2 in the presence of UNC119a is not influenced by the nature of the nucleotide bound to Arl2. This is clearly different from Arl3, which has a higher affinity to UNC119a. In turn, this affinity is highly dependent on the N-terminus, where the presence of UNC119a has a strong influence on the interaction of Arl3•GppNHp with membranes.

### CONCLUSIONS

The membrane binding of Arl2 and Arl3 is expected to be mediated only by the N-terminal helix since they lack a myristoyl anchor at the N-terminal glycine. Thus, the net positive charge of the amphipathic helices of Arl2 and Arl3 is thought to promote their interaction with anionic lipid membranes. However, control experiments in which Arl3•GppNHp interacted with a zwitterionic model raft membrane revealed that membrane insertion of the N-terminal helix of Arl3•GppNHp occurred independently of the membrane composition and presence of anionic lipids (cf. Fig. S6). Moreover, each basic residue probably contributes only ~0.5 kcal/mol to the binding free energy, possibly due to a compensation for the helix net charge reduction by a closer localization of the basic residues to the anionic membrane (34). Consequently, the different positive net charges of +4 and +3 for the helices of Arl2 and Arl3, respectively, are not supposed to significantly affect the binding free energy and membrane interaction behavior. For the Arf-related protein Sar1, it has been shown that the amphipathic helix is indeed sufficient for membrane binding (20,21). The results presented here show that the N-terminal amphipathic helix is essential and sufficient for proper membrane binding of both Arl2 and Arl3. However, their membrane interaction behavior differs significantly with regard to nucleotide



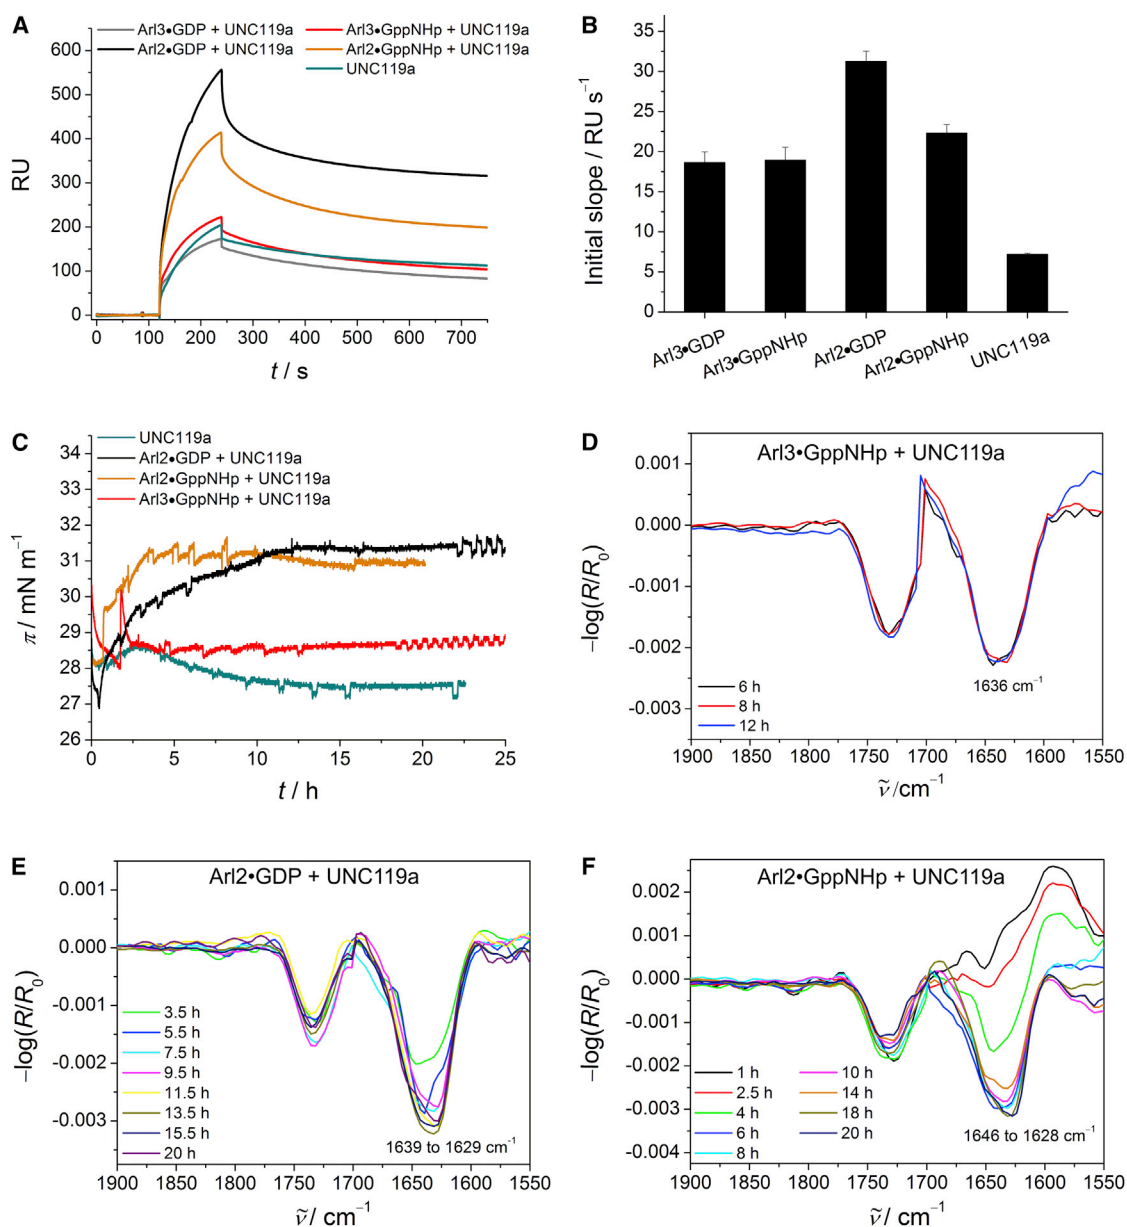

FIGURE 6 Membrane interaction of GDP- and GppNHp-loaded Arl2/3 in complex with UNC119a. (A) SPR sensorgrams of the binding of UNC119a-complexed Arl2/3 ( $c_{\text{Arl2/3}} = 2 \mu\text{M}$ ,  $c_{\text{UNC119a}} = 3 \mu\text{M}$ ), as well as UNC119a alone, to anionic model raft membranes composed of DOPC/DOPG/DPPC/DPPG/Chol 20:5:45:5:25 (mol %). Side-by-side comparisons of the SPR curves are shown in Fig. S5. (B) Corresponding SPR data for the initial association process. The error bars represent the standard deviation from three to nine measurements. (C) Surface pressure/time isotherms for the membrane interaction of Arl2/3 in complex with UNC119a (2:3 molar ratio), as well as UNC119a alone, with anionic lipid raft monolayers. (D–F) Corresponding time-dependent IRRA spectra for the amide-I' region of Arl3•GppNHp (D), Arl2•GDP (E), and Arl2•GppNHp (F) in complex with UNC119a in the presence of anionic lipid raft monolayers. All IRRA spectra were recorded with p-polarized light at a  $35^\circ$  angle of incidence. To see this figure in color, go online.

loading. Unlike Arl3 and other Arf proteins, Arl2 binds to membranes in a nucleotide-independent manner, whereas the membrane interaction of Arl3 is regulated by its nucleotide status. We propose that these differences are due to the availability of the N-terminal amphipathic helix for membrane insertion. Whereas the N-terminal helix of Arl2 seems to be flexible and sufficiently exposed in both nucleotide states to mediate an interaction with the membrane, the N-terminal helix of Arl3 is only exposed in the GTP-loaded

state, preventing proper membrane binding of Arl3•GDP (Fig. 7).

The interaction of Arl2/3 with GDI-like solubilizing factors has already been studied in solution, but data obtained in the presence of membranes are rather scarce. Here, we show that binding of the effector UNC119a, which is GTP dependent in solution for both Arl2 and Arl3 (5), is much tighter for Arl3 than for Arl2. The fact that the N-terminal helix is almost exclusively responsible for the higher affinity

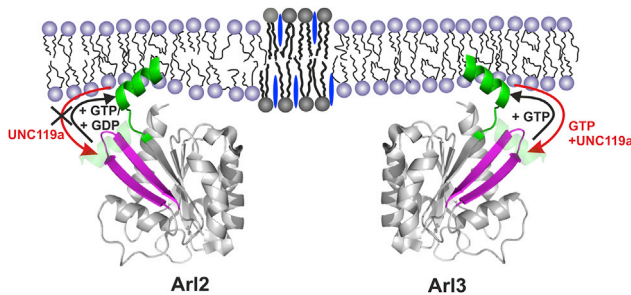

FIGURE 7 Schematic representation of the membrane interaction of Arl2 and Arl3, and the influence of UNC119a. To see this figure in color, go online.

seems to suggest that its position in Arl2•GTP is different from that in the Arl3•GTP-UNC119 complex structure (4), and it may be detached from the core protein, as observed with PDE $\delta$  (Fig. 1). Since Arl2 binding to membranes is independent of the nucleotide state of Arl2, we hypothesize that the N-terminal helix is flexible in both states and thus is able to interact with membranes. Correspondingly, we found that complex formation with UNC119a did not significantly alter the membrane binding behavior of Arl2 in both nucleotide-bound states, suggesting that the N-terminal helix is not involved in the interaction between Arl2 and UNC119a (Fig. 7). Moreover, this confirms the previous notion that the N-terminal helix is pointing into solution and thus would be available for membrane insertion in the Arl2•GppNHp-UNC119a complex. This might also be a reason for the inability of Arl2•GTP to allosterically regulate cargo release from UNC119a. In contrast, we show that UNC119a selectively impedes membrane binding of Arl3•GppNHp, since the N-terminal helix of Arl3•GppNHp is no longer available for membrane insertion in the UNC119a-complexed state. In turn, this implies that membrane-bound Arl3•GTP is not able to bind UNC119a/b.

Arl2 and Arl3 regulate the release of cargo from the shuttle factors PDE $\delta$ , UNC119a, and UNC119b. However, a distinction has to be made in the cell between cargo destined for cilia and cargo for the rest of the cell. Examples of the former would include myristoylated NPHP3 and farnesylated INPP5E, which are localized exclusively in cilia (11,35,36). Since one can assume that Arl2 and Arl3 travel freely across the functional barrier of the transition zone, a mechanism is required to retain Arl3 in the ciliary compartment. Because we and others have postulated the presence of an Arl3-specific GEF in cilia, and it has been shown that RP2, the specific Arl3-GAP, is located outside, such a GEF would specifically activate Arl3 and allow its N-terminal helix to interact with the membrane (4,5,11). Recently, it has also been shown that proteins interacting with the NH<sub>2</sub>-terminus of Arl3 may function as displacing factors as an alternative to membranes (37,38).

## SUPPORTING MATERIAL

Supporting Materials and Methods, six figures, and three tables are available at [http://www.biophysj.org/biophysj/supplemental/S0006-3495\(15\)00868-1](http://www.biophysj.org/biophysj/supplemental/S0006-3495(15)00868-1).

## AUTHOR CONTRIBUTIONS

S.K., S.A.I., A.W., R.W., and K.W. conceived and designed experiments. S.A.I. and E.K.F. synthesized and purified proteins. S.K., E.K.F., S.M., and K.W. performed experiments and analyzed data. S.K., S.A.I., A.W., and K.W. wrote the article.

## ACKNOWLEDGMENTS

This research was supported by the Deutsche Forschungsgemeinschaft (DFG, SFB 642) and the Max Planck Society (IMPRS Chemical and Molecular Biology).

## SUPPORTING CITATIONS

References (39–43) appear in the [Supporting Material](#).

## REFERENCES

- Gillingham, A. K., and S. Munro. 2007. The small G proteins of the Arf family and their regulators. *Annu. Rev. Cell Dev. Biol.* 23:579–611.
- Sharer, J. D., and R. A. Kahn. 1999. The ARF-like 2 (ARL2)-binding protein, BART. Purification, cloning, and initial characterization. *J. Biol. Chem.* 274:27553–27561.
- Kobayashi, A., S. Kubota, ..., G. Inana. 2003. Photoreceptor synaptic protein HRG4 (UNC119) interacts with ARL2 via a putative conserved domain. *FEBS Lett.* 534:26–32.
- Ismail, S. A., Y. X. Chen, ..., A. Wittinghofer. 2012. Structural basis for Arl3-specific release of myristoylated ciliary cargo from UNC119. *EMBO J.* 31:4085–4094.
- Veltel, S., A. Kravchenko, ..., A. Wittinghofer. 2008. Specificity of Arl2/Arl3 signaling is mediated by a ternary Arl3-effector-GAP complex. *FEBS Lett.* 582:2501–2507.
- Hanzal-Bayer, M., L. Renault, ..., R. C. Hillig. 2002. The complex of Arl2-GTP and PDE delta: from structure to function. *EMBO J.* 21:2095–2106.
- Ismail, S. A., Y. X. Chen, ..., A. Wittinghofer. 2011. Arl2-GTP and Arl3-GTP regulate a GDI-like transport system for farnesylated cargo. *Nat. Chem. Biol.* 7:942–949.
- Linari, M., M. Hanzal-Bayer, and J. Becker. 1999. The delta subunit of rod specific cyclic GMP phosphodiesterase, PDE delta, interacts with the Arf-like protein Arl3 in a GTP specific manner. *FEBS Lett.* 458:55–59.
- Veltel, S., R. Gasper, ..., A. Wittinghofer. 2008. The retinitis pigmentosa 2 gene product is a GTPase-activating protein for Arf-like 3. *Nat. Struct. Mol. Biol.* 15:373–380.
- Jaworek, T. J., E. M. Richard, ..., S. Riazuddin. 2013. An alteration in ELMOD3, an Arl2 GTPase-activating protein, is associated with hearing impairment in humans. *PLoS Genet.* 9:e1003774.
- Wright, K. J., L. M. Baye, ..., P. K. Jackson. 2011. An ARL3-UNC119-RP2 GTPase cycle targets myristoylated NPHP3 to the primary cilium. *Genes Dev.* 25:2347–2360.
- Grayson, C., F. Bartolini, ..., M. E. Cheetham. 2002. Localization in the human retina of the X-linked retinitis pigmentosa protein RP2, its homologue cofactor C and the RP2 interacting protein Arl3. *Hum. Mol. Genet.* 11:3065–3074.

13. Bhamidipati, A., S. A. Lewis, and N. J. Cowan. 2000. ADP ribosylation factor-like protein 2 (Arl2) regulates the interaction of tubulin-folding cofactor D with native tubulin. *J. Cell Biol.* 149:1087–1096.
14. Zhou, C., L. Cunningham, ..., R. A. Kahn. 2006. Arl2 and Arl3 regulate different microtubule-dependent processes. *Mol. Biol. Cell.* 17:2476–2487.
15. Newman, L. E., C. J. Zhou, ..., R. A. Kahn. 2014. The ARL2 GTPase is required for mitochondrial morphology, motility, and maintenance of ATP levels. *PLoS One.* 9:e99270.
16. Pasqualato, S., L. Renault, and J. Cherfils. 2002. Arf, Arl, Arp and Sar proteins: a family of GTP-binding proteins with a structural device for 'front-back' communication. *EMBO Rep.* 3:1035–1041.
17. Pasqualato, S., J. Ménétrey, ..., J. Cherfils. 2001. The structural GDP/GTP cycle of human Arf6. *EMBO Rep.* 2:234–238.
18. Antony, B., S. Beraud-Dufour, ..., M. Chabre. 1997. N-terminal hydrophobic residues of the G-protein ADP-ribosylation factor-1 insert into membrane phospholipids upon GDP to GTP exchange. *Biochemistry.* 36:4675–4684.
19. Bologna, G., C. Yvon, ..., A. L. Veuthey. 2004. N-Terminal myristoylation predictions by ensembles of neural networks. *Proteomics.* 4:1626–1632.
20. Lee, M. C., L. Orci, ..., R. Schekman. 2005. Sar1p N-terminal helix initiates membrane curvature and completes the fission of a COPII vesicle. *Cell.* 122:605–617.
21. Jin, H., S. R. White, ..., M. V. Nachury. 2010. The conserved Bardet-Biedl syndrome proteins assemble a coat that traffics membrane proteins to cilia. *Cell.* 141:1208–1219.
22. Wätzlich, D., I. Vetter, ..., S. Ismail. 2013. The interplay between RPGR, PDE $\delta$  and Arl2/3 regulate the ciliary targeting of farnesylated cargo. *EMBO Rep.* 14:465–472.
23. Gautier, R., D. Douguet, ..., G. Drin. 2008. HELIQUEST: a web server to screen sequences with specific alpha-helical properties. *Bioinformatics.* 24:2101–2102.
24. Weise, K., G. Triola, ..., R. Winter. 2009. Influence of the lipidation motif on the partitioning and association of N-Ras in model membrane subdomains. *J. Am. Chem. Soc.* 131:1557–1564.
25. Weise, K., S. Kapoor, ..., R. Winter. 2011. Membrane-mediated induction and sorting of K-Ras microdomain signaling platforms. *J. Am. Chem. Soc.* 133:880–887.
26. Kühnel, K., S. Veltel, ..., A. Wittinghofer. 2006. Crystal structure of the human retinitis pigmentosa 2 protein and its interaction with Arl3. *Structure.* 14:367–378.
27. Weise, K., S. Kapoor, ..., R. Winter. 2012. Dissociation of the K-Ras4B/PDE $\delta$  complex upon contact with lipid membranes: membrane delivery instead of extraction. *J. Am. Chem. Soc.* 134:11503–11510.
28. Kaneshiro, E. S. 1990. Lipids of ciliary and flagellar membranes. In *Ciliary and Flagellar Membranes*. R. A. Bloodgood, editor. Plenum Press, New York.
29. Tyler, K. M., A. Fridberg, ..., D. M. Engman. 2009. Flagellar membrane localization via association with lipid rafts. *J. Cell Sci.* 122:859–866.
30. Kapoor, S., A. Werkmüller, ..., R. Winter. 2011. Temperature-pressure phase diagram of a heterogeneous anionic model biomembrane system: results from a combined calorimetry, spectroscopy and microscopy study. *Biochim. Biophys. Acta.* 1808:1187–1195.
31. Vogel, A., J. Nikolaus, ..., D. Huster. 2014. Interaction of the human N-Ras protein with lipid raft model membranes of varying degrees of complexity. *Biol. Chem.* 395:779–789.
32. Loftus, A. F., V. L. Hsieh, and R. Parthasarathy. 2012. Modulation of membrane rigidity by the human vesicle trafficking proteins Sar1A and Sar1B. *Biochem. Biophys. Res. Commun.* 426:585–589.
33. Manneville, J. B., J. F. Casella, ..., B. Goud. 2008. COPI coat assembly occurs on liquid-disordered domains and the associated membrane deformations are limited by membrane tension. *Proc. Natl. Acad. Sci. USA.* 105:16946–16951.
34. Wang, J., A. Gambhir, ..., S. McLaughlin. 2002. Lateral sequestration of phosphatidylinositol 4,5-bisphosphate by the basic effector domain of myristoylated alanine-rich C kinase substrate is due to nonspecific electrostatic interactions. *J. Biol. Chem.* 277:34401–34412.
35. Thomas, S., K. J. Wright, ..., T. Attié-Bitach. 2014. A homozygous PDE6D mutation in Joubert syndrome impairs targeting of farnesylated INPP5E protein to the primary cilium. *Hum. Mutat.* 35:137–146.
36. Jacoby, M., J. J. Cox, ..., S. Schurmans. 2009. INPP5E mutations cause primary cilium signaling defects, ciliary instability and ciliopathies in human and mouse. *Nat. Genet.* 41:1027–1031.
37. Behnia, R., B. Panic, ..., S. Munro. 2004. Targeting of the Arf-like GTPase Arl3p to the Golgi requires N-terminal acetylation and the membrane protein Sys1p. *Nat. Cell Biol.* 6:405–413.
38. Setty, S. R., T. I. Strochlic, ..., C. G. Burd. 2004. Golgi targeting of ARF-like GTPase Arl3p requires its N-alpha-acetylation and the integral membrane protein Sys1p. *Nat. Cell Biol.* 6:414–419.
39. Gohlke, A., G. Triola, ..., R. Winter. 2010. Influence of the lipid anchor motif of N-ras on the interaction with lipid membranes: a surface plasmon resonance study. *Biophys. J.* 98:2226–2235.
40. Cooper, M. A., A. Hansson, ..., D. H. Williams. 2000. A vesicle capture sensor chip for kinetic analysis of interactions with membrane-bound receptors. *Anal. Biochem.* 277:196–205.
41. Besenica, M., P. Macek, ..., G. Anderluh. 2006. Surface plasmon resonance in protein-membrane interactions. *Chem. Phys. Lipids.* 141:169–178.
42. Mozsolits, H., W. G. Thomas, and M. I. Aguilar. 2003. Surface plasmon resonance spectroscopy in the study of membrane-mediated cell signaling. *J. Pept. Sci.* 9:77–89.
43. Mendelsohn, R., G. Mao, and C. R. Flach. 2010. Infrared reflection-absorption spectroscopy: principles and applications to lipid-protein interaction in Langmuir films. *Biochim. Biophys. Acta.* 1798:788–800.

– Supporting Material –

**Effect of the N-Terminal Helix and Nucleotide Loading on the Membrane and Effector Binding of Arl2/3**

Shobhna Kapoor,<sup>1,2,⊥</sup> Eyad K. Fansa,<sup>3,⊥</sup> Simone Möbitz,<sup>1</sup> Shehab A. Ismail,<sup>3,4</sup> Roland Winter,<sup>1</sup> Alfred Wittinghofer,<sup>3,\*</sup> and Katrin Weise<sup>1,\*</sup>

<sup>1</sup> Physical Chemistry I – Biophysical Chemistry, TU Dortmund University, Otto-Hahn-Strasse 6, 44227 Dortmund, Germany

<sup>2</sup> Department of Chemical Biology, Max Planck Institute of Molecular Physiology, Otto-Hahn-Strasse 11, 44227 Dortmund, Germany

<sup>3</sup> Structural Biology Group, Max Planck Institute of Molecular Physiology, Otto-Hahn-Strasse 11, 44227 Dortmund, Germany

<sup>4</sup> Structural Biology of Cilia, CR-UK Beatson Institute, Garscube Estate Switchback Road, Glasgow G61 1BD, United Kingdom

\*Correspondence:

[katrin.weise@tu-dortmund.de](mailto:katrin.weise@tu-dortmund.de) or [alfred.wittinghofer@mpi-dortmund.mpg.de](mailto:alfred.wittinghofer@mpi-dortmund.mpg.de)

Author Contribution:

<sup>⊥</sup> Shobhna Kapoor and Eyad K. Fansa contributed equally to this work.

## MATERIALS AND METHODS

### Surface plasmon resonance (SPR)

SPR experiments were carried out with a Biacore 3000 system (Biacore, Uppsala, Sweden; now GE Healthcare). For the protein-membrane interaction studies, the pioneer L1 sensor chip (GE Healthcare, Munich, Germany) was used that is composed of a thin lipophilic modified dextran matrix on a gold surface, upon which lipid bilayers can be immobilized through the capture of liposomes by the lipophilic compounds (1,2). The chip has been shown to be suitable for the generation of model membrane systems that provide a flexible lipid bilayer surface that closely resembles the surface of a cellular membrane (3,4). All measurements were carried out at a temperature of 25°C, with the samples cooled at 10°C in the autosampler before the measurement was started.

Prior to the experiment, the L1 chip was primed 4× with Hepes buffer (10 mM Hepes, 5 mM MgCl<sub>2</sub>, 150 mM NaCl, pH 7.5). Afterwards, the chip surface underwent a cleaning program by injecting 30 μL 2-propanol / 50 mM NaOH (2:3), 10 μL octyl β-D-glucopyranoside (40 mM), and 30 μL Chaps (20 mM), NaCl (100 mM), and CaCl<sub>2</sub> (20 mM) at a flow rate of 5 μL/min. For vesicle immobilization, 15 μL of the extruded lipid vesicle solution (0.5 mM) were injected twice at a flow rate of 2 μL/min, which was followed by a stabilization phase by injecting 50 μL of Hepes buffer at a flow rate of 100 μL/min and three further injections of 10 μL 25 mM NaOH at a flow rate of 5 μL/min. Finally, the lipid surface was stabilized by injecting 40 μL Hepes buffer at a flow rate of 20 μL/min. After baseline stabilization, 40 μL of the protein containing solution ( $c_{Arl} = 2 \mu\text{M}$ ,  $c_{UNC119a} = 3 \mu\text{M}$ ) were injected at a flow rate of 20 μL/min and the dissociation was followed for 30 min. For the membrane interaction studies with the UNC119a-complexed Arl, both proteins were mixed prior to injection into the SPR flow cell to yield a final concentration of 2 μM Arl and 3 μM UNC119a. After following the dissociation for 30 min, the chip surface was regenerated using the cleaning program. The degree of chip surface coverage with lipids was determined by means of 0.5 μM BSA and was found to be ≥75% for all cases.

To eliminate unspecific binding effects such as the interaction of Hepes buffer with the L1 chip and non-specific binding of the proteins to the pure L1 chip that depend on the determined lipid coverage, these signals were subtracted from the actual sensorgrams of the respective protein solutions. Hence, the ratio of the maximal amplitude of the BSA-membrane and BSA-chip sensorgram yields the amount of the chip surface that is not covered with lipids and is used as a factor for correcting the zeroized (i.e., setting the baseline before injection of the protein solution to zero) protein-chip sensorgram. This corrected sensorgram is then subtracted from the buffer-corrected and zeroized protein-membrane sensorgram to yield the final protein-membrane sensorgram for analysis. All sensorgrams were recorded at a frequency of 10 Hz.

For all measurements performed, the SPR data were analyzed on the basis of a multi-step model owing to the non-simple-exponential association and dissociation curves observed in the sensorgrams for the protein-membrane interaction, reflecting a complex interaction behavior. A two-step reaction model was shown to provide an appropriate curve-fitting algorithm and describes a process with two reaction steps that, in terms of protein-lipid interactions, correspond to:

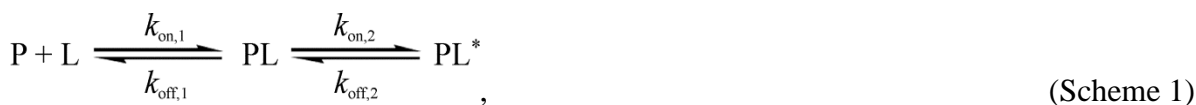

where the soluble protein (P) binds to the immobilized lipids (L) forming a primary binding complex (PL) and a secondary protein-lipid complex (PL\*, e.g., a clustered state as shown previously for K-Ras4B by atomic force microscopy (5) and in the present manuscript for Arl2/3). The effect of Arl clustering on the response measured is indirect in altering the equilibrium between the bound and free forms of the protein, allowing a dissociation of PL\* only through reversal of the clustering reaction step. To directly obtain values for the association rate constant  $k_{on}$ , the whole sensorgram was fitted to the two-step model. The parameters  $k_{on,1}$  and  $k_{on,2}$  represent the corresponding association rates of the respective reaction steps. Curve fitting was performed by using the Marquardt-Levenberg algorithm and the fitted curves were generated by numerical integration of the differential equations that describe the reaction scheme. This fitting procedure was implemented in the BIAevaluation software 4.1 (Biacore, Uppsala, Sweden). Representative fits of the SPR curves are shown in Fig. S1 (see below). Owing to this complex reaction scheme, the maximum error bars of the fits were sometimes large due to error propagation. Hence, the initial association phase (for  $t \rightarrow 0$ ), which is directly proportional to  $k_{on,1}$ , was also evaluated by linear regression using Origin 7 (OriginLab Corporation, Northampton, MA, USA), resulting in values for the initial slope of the sensorgram. The model and the corresponding analysis have been described in detail in ref. 1.

Whereas the two-step fit of the whole sensorgram gave reasonable results for the association phase, a larger discrepancy was observed for the fitted dissociation part of the curve. Thus, the dissociation phase was fitted separately to a biexponential model (Eq. 1) using Origin 7, yielding two independent dissociation rate constants  $k_{off,1}$  and  $k_{off,2}$  as well as their respective contributions  $A_1$  and  $A_2$ .

$$R = A_1 \times e^{-k_{off,1}(t-t_0)} + A_2 \times e^{-k_{off,2}(t-t_0)} + \text{offset} \quad (1)$$

$t_0$  indicates the beginning of the dissociation phase, i.e., the time point when the flow cell switched from protein to buffer solution. The relative amount of quasi-irreversibly bound protein was derived by correlating the offset value of the biexponential fit to the initial amplitude at the starting point ( $t = 0$ ) of the dissociation phase corresponding to the following equation:

$$\text{quasi - irrevers.} = \frac{\text{offset}}{A_1 + A_2 + \text{offset}} \quad (2)$$

From Eq. 1, an average dissociation rate  $\bar{k}_{diss}$  can be calculated:

$$\bar{k}_{diss} = \frac{A_1}{A_1 + A_2} \times k_{off,1} + \frac{A_2}{A_1 + A_2} \times k_{off,2} \quad (3)$$

The error bars in all experiments represent the standard deviation from at least three (up to six) independently conducted experiments, and the corresponding values for all determined kinetic parameters are given in Tables S1–S3.

## FIGURES

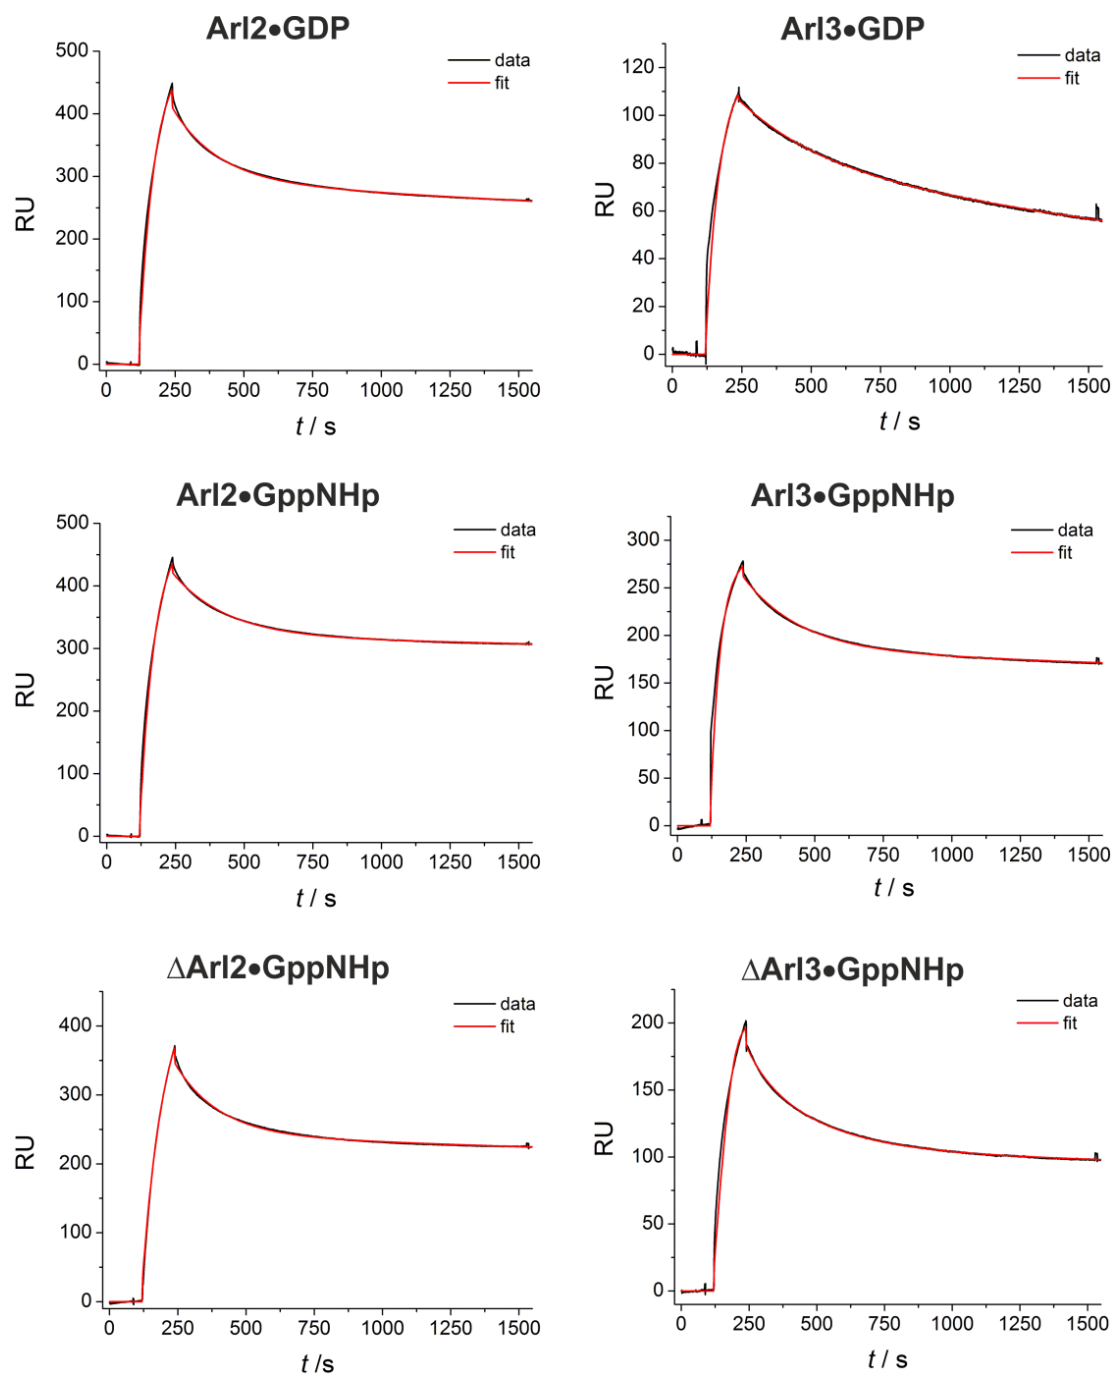

FIGURE S1 Representative fits (red curves) of the SPR sensorgrams (black curves) of the different proteins by use of the Marquardt-Levenberg algorithm, with the fitted curves being generated by numerical integration of the differential equations that describe the two-step reaction scheme (Scheme 1, see above). This fitting procedure was implemented in the BIAevaluation software 4.1 (Biacore, Uppsala, Sweden).

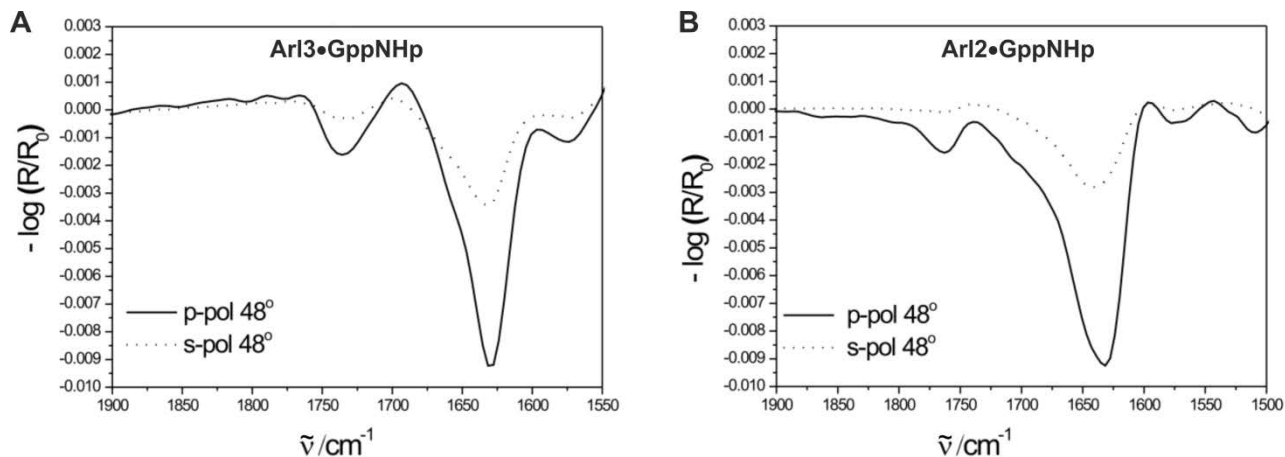

FIGURE S2 Comparison of spectral details between s- and p-polarized light. IRRA spectra for the amide-I' region of Arl3•GppNHp (A) and Arl2•GppNHp (B) in the presence of anionic raft membranes. All IRRA spectra were recorded with p-polarized or s-polarized light at 48° angle of incidence.

p-polarized IRRAS amide-I' peaks can be positive or negative depending on the direction of the transition moment of the amide-I' helices, with respect to the angle of incidence. The main purpose of using p-polarized light for the present study instead of s-polarized light, where all peaks are negative, was mainly to obtain a large signal and better signal-to-noise ratio for membrane-bound proteins. The figure shows the IRRA spectra for membrane-bound Arl2/3 obtained using both p- and s-polarized light at 48° angle of incidence. As can be seen the spectra acquired using p-polarized light have at least 3-fold higher intensity than their s-polarized counterparts, though the wavenumber maximum for the amide-I' band is the same for both IR radiations, providing the same structural information. This higher intensity obtained by using p-polarized light is explained in detail in theory (6).



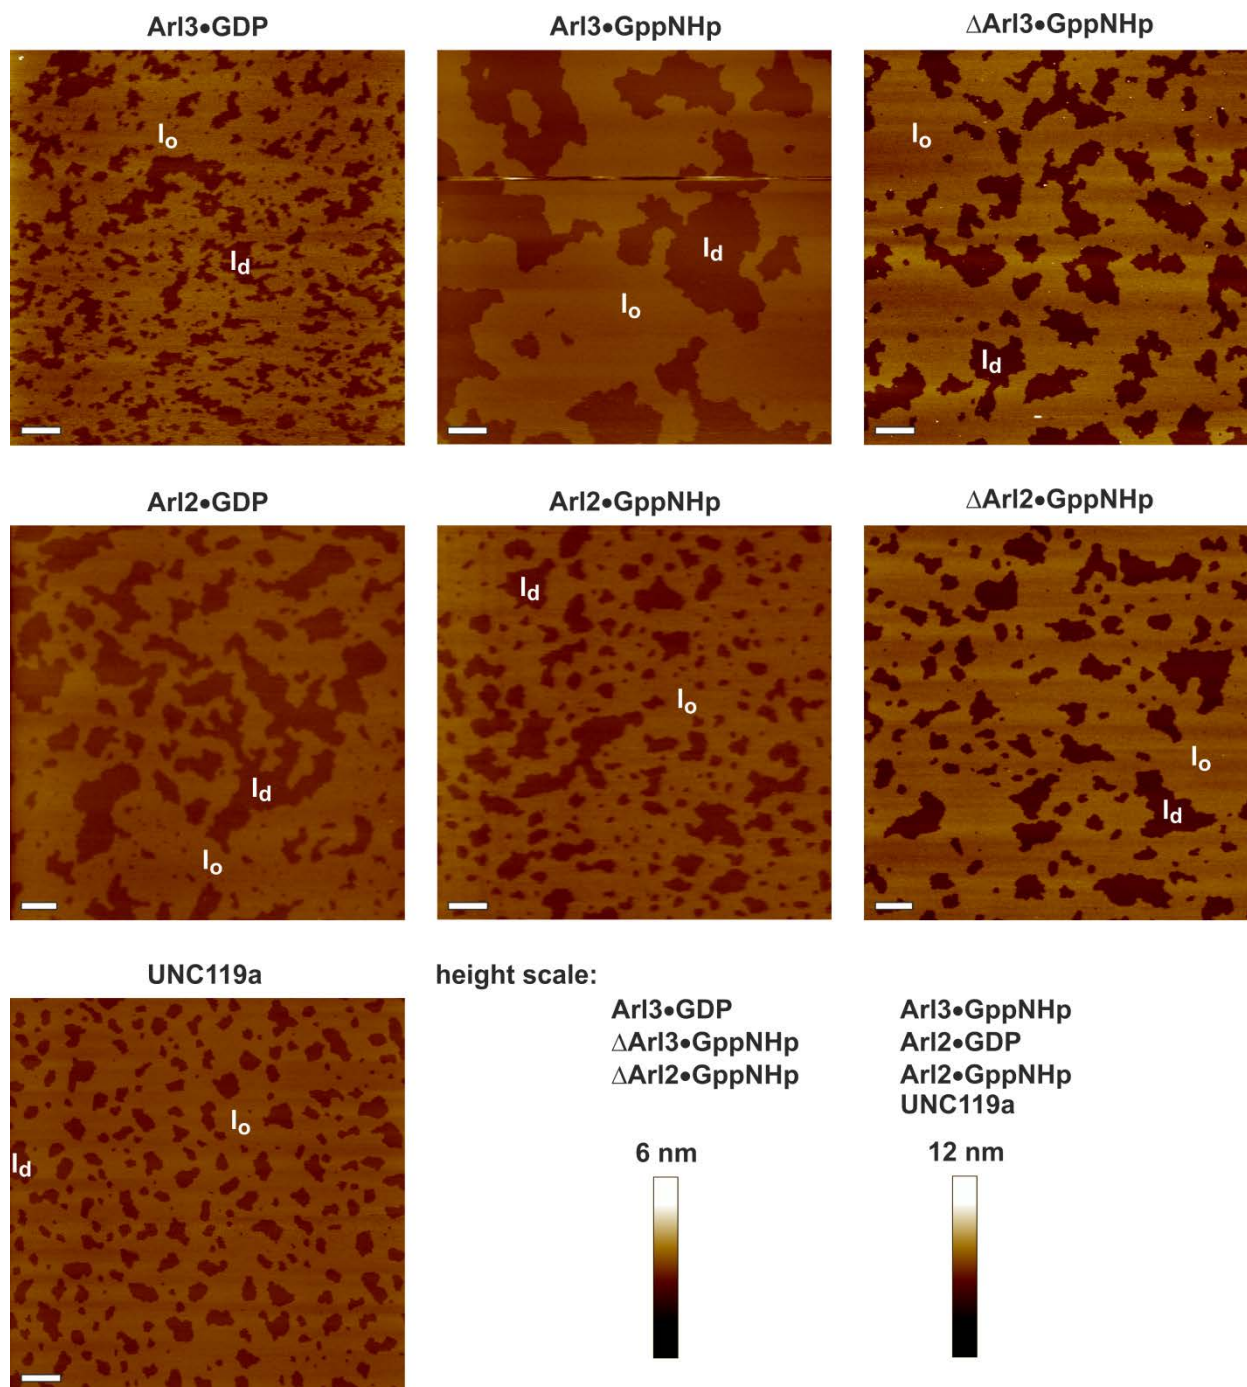

FIGURE S3 AFM images of the anionic model raft membrane consisting of DOPC/DOPG/DPPC/DPPG/Chol 20:5:45:5:25 (mol %) on mica before addition of the corresponding proteins. All AFM images show a defect-free, continuous lipid bilayer on mica with isolated liquid-disordered ( $l_d$ ) domains in a liquid-ordered ( $l_o$ ) membrane matrix at room temperature. The overall height of the vertical color scale corresponds to 6 nm for Arl3•GDP,  $\Delta$ Arl3•GppNHp, and  $\Delta$ Arl2•GppNHp, and 12 nm for Arl3•GppNHp, Arl2•GDP, Arl2•GppNHp, and UNC119a, comparable to the AFM images shown in Fig. 4. The scale bar represents 1  $\mu$ m for all images.

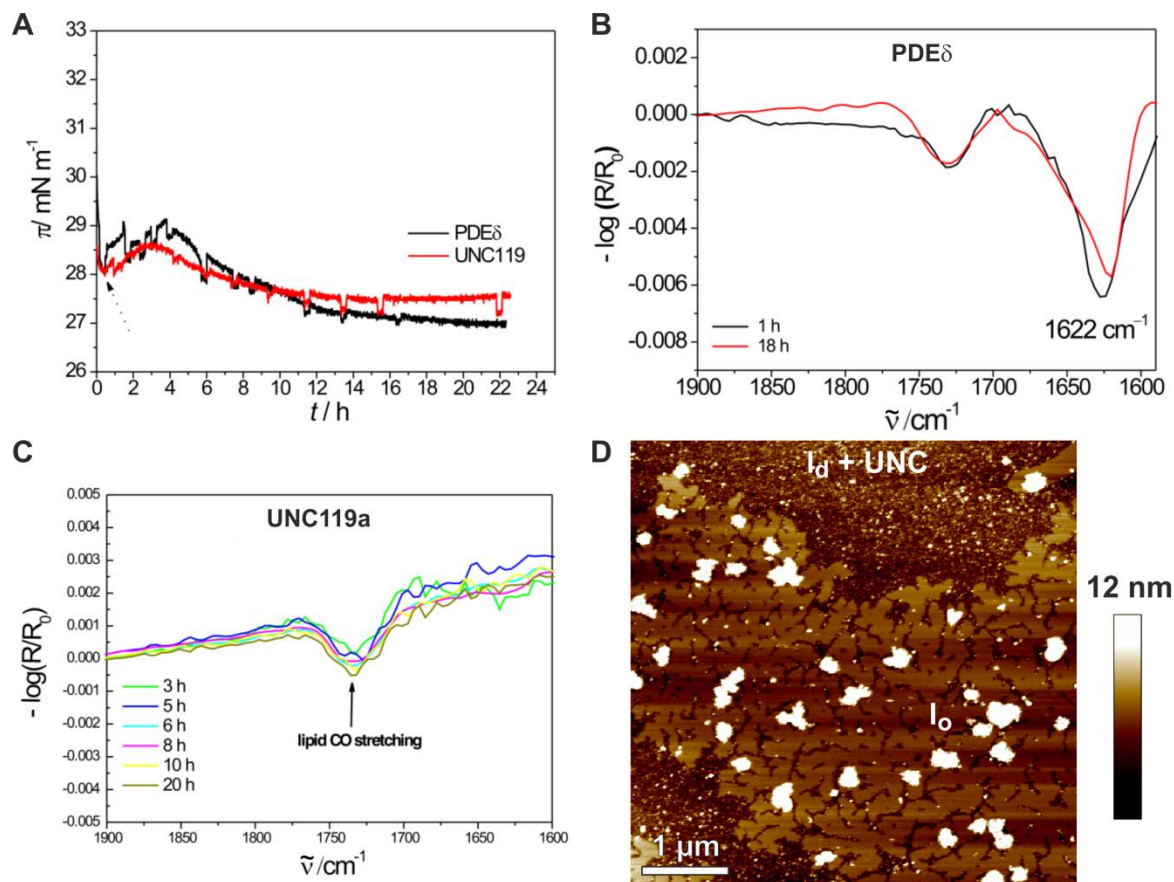

FIGURE S4 Membrane interaction of UNC119a in comparison to PDE $\delta$ . (A) Surface pressure/time isotherms for the interaction of PDE $\delta$  and UNC119a with anionic lipid raft membranes. Corresponding IRRAS spectra for the amide-I' region of PDE $\delta$  (B) and UNC119a (C) in the presence of anionic monolayers. All IRRAS spectra were recorded with p-polarized light at 35° angle of incidence. (D) AFM image of the membrane interaction of UNC119a.

Even though membrane interaction of UNC119a seems to be weaker as compared to the other proteins, there is direct evidence in the SPR, IRRAS, and AFM data. Although changes in surface pressure are rather small for UNC119a, the structurally related protein PDE $\delta$  (delta subunit of type 6 phosphodiesterase) showed a similar effect on surface pressure upon membrane interaction. Whereas no amide-I' band could be detected in the IRRAS spectra for UNC119a in the presence of anionic model raft membranes, PDE $\delta$  exhibited a strong IRRAS amide-I' band intensity centered at 1622  $\text{cm}^{-1}$ , being indicative for the  $\beta$ -sheets of the immunoglobulin-like  $\beta$ -sandwich structure. This point toward a strong adsorption of PDE $\delta$  at, but no insertion into, the lipid monolayer. The absence of an amide-I' band for UNC119a suggests a weak membrane interaction profile. In addition, SPR sensorgrams revealed some binding of UNC119a to anionic model membranes, even though the initial slope is low (cf. Fig. 6A, B). Finally, complementary AFM measurements show a binding of UNC119a to  $I_d$  domains of phase-separated membranes, with small protein clusters being detectable. The larger amount of proteins detected in the AFM images as compared to IRRAS can be explained by the different instrumental setups: In IRRAS the proteins are injected in the subphase of the Langmuir trough underneath the lipid monolayer and thus need to diffuse (upwards) to the lipid/air interface. In contrast, in the AFM fluid cell the protein solution is injected across the mica-supported lipid bilayer.

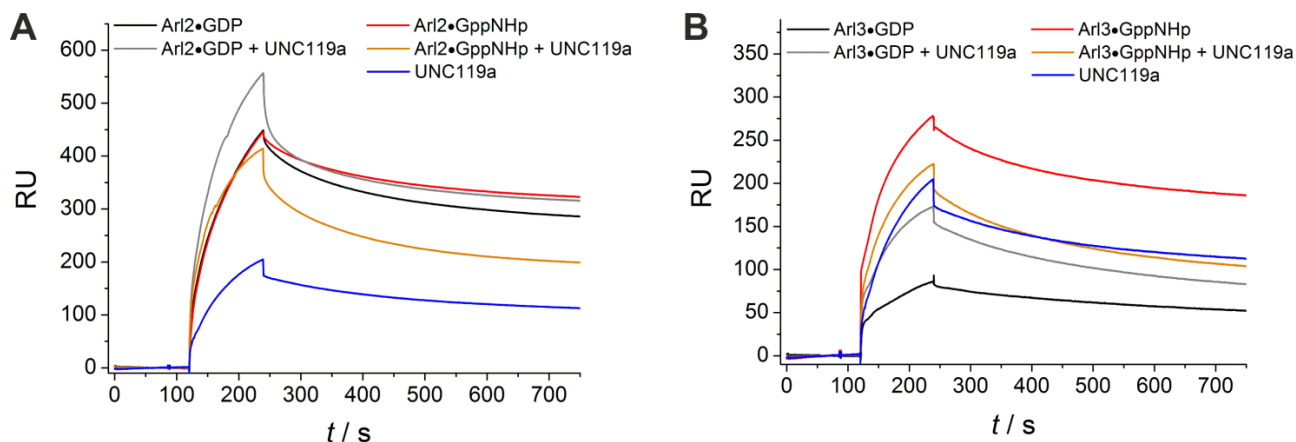

FIGURE S5 Effect of UNC119a on the SPR sensorgrams of Arl2 (A) and Arl3 (B) in the presence of anionic raft membranes.

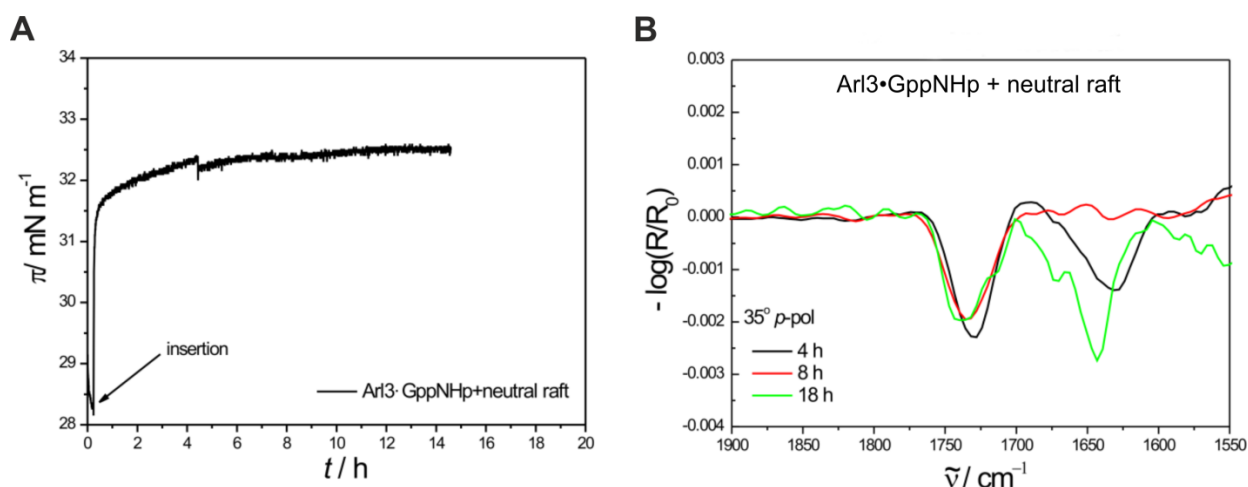

FIGURE S6 Interaction of GppNHp-loaded Arl3 with zwitterionic lipid raft monolayers composed of DOPC/DPPC/Chol 25:50:25 (mol %). (A) Surface pressure/time isotherm for the membrane binding of Arl3•GppNHp to neutral lipid raft monolayers. (B) Corresponding time-dependent IRRA spectra for the amide-I' region of membrane-bound Arl3•GppNHp. All IRRA spectra were recorded with p-polarized light at 35° angle of incidence. Whereas the surface pressure profile reveals no significant differences to the binding of Arl3•GppNHp to anionic lipid raft monolayers ( $\Delta\pi \approx 3\text{-}4$  mN/m, cf. Fig. 2C), the intensity of the amide-I' band in the concomitant IRRA spectra is about two-fold less upon binding of Arl3•GppNHp to neutral lipid raft membranes (cf. Fig. 2D), which can be due to a different orientation of the protein at the membrane. The results demonstrate that membrane insertion of the N-terminal helix of Arl3•GppNHp occurs independently of the membrane composition and presence of negatively charged lipids.

## TABLES

**Table S1:** Summary of all kinetic parameters of the interaction of GDP- and GppNHp-loaded Arl2 as well as truncated, GppNHp-loaded Arl2 with membranes composed of DOPC/DOPG/DPPC/DPPG/Chol 20:5:45:5:25 (mol %). In the table, the mean value  $\pm$  standard deviation ( $n = 3-5$ ) is given.

|                                | Arl2•GDP                                | Arl2•GppNHp                             | $\Delta$ Arl2•GppNHp                    |
|--------------------------------|-----------------------------------------|-----------------------------------------|-----------------------------------------|
| $k_{on,1} / M^{-1} s^{-1}$     | $1.50 \times 10^4 \pm 6.89 \times 10^3$ | $1.03 \times 10^4 \pm 1.84 \times 10^3$ | $2.07 \times 10^4 \pm 2.93 \times 10^4$ |
| $k_{on,2} / s^{-1}$            | $0.003 \pm 8.47 \times 10^{-4}$         | $0.003 \pm 1.68 \times 10^{-4}$         | $0.002 \pm 8.80 \times 10^{-4}$         |
| $k_{off,1} / s^{-1}$           | $0.012 \pm 0.012$                       | $0.011 \pm 0.008$                       | $0.015 \pm 0.002$                       |
| $k_{off,2} / s^{-1}$           | $0.013 \pm 0.010$                       | $0.015 \pm 0.014$                       | $0.003 \pm 3.44 \times 10^{-4}$         |
| $\bar{k}_{diss} / s^{-1}$      | $0.009 \pm 0.001$                       | $0.008 \pm 0.001$                       | $0.006 \pm 0.002$                       |
| quasi-irrev. bound protein / % | $62.77 \pm 5.08$                        | $69.06 \pm 2.25$                        | $64.84 \pm 2.98$                        |
| initial slope / RU $s^{-1}$    | $17.08 \pm 2.01$                        | $12.33 \pm 1.36$                        | $3.25 \pm 1.63$                         |

**Table S2:** Summary of all kinetic parameters of the interaction of GDP- and GppNHp-loaded Arl3 as well as truncated, GppNHp-loaded Arl3 with membranes composed of DOPC/DOPG/DPPC/DPPG/Chol 20:5:45:5:25 (mol %). In the table, the mean value  $\pm$  standard deviation ( $n = 3-6$ ) is given.

|                                | Arl3•GDP                                | Arl3•GppNHp                             | $\Delta$ Arl3•GppNHp                    |
|--------------------------------|-----------------------------------------|-----------------------------------------|-----------------------------------------|
| $k_{on,1} / M^{-1} s^{-1}$     | $1.30 \times 10^4 \pm 2.30 \times 10^3$ | $2.53 \times 10^4 \pm 2.16 \times 10^4$ | $2.07 \times 10^4 \pm 8.64 \times 10^3$ |
| $k_{on,2} / s^{-1}$            | $0.001 \pm 7.22 \times 10^{-4}$         | $0.002 \pm 4.15 \times 10^{-4}$         | $0.003 \pm 0.002$                       |
| $k_{off,1} / s^{-1}$           | $0.009 \pm 0.009$                       | $0.011 \pm 0.006$                       | $0.013 \pm 0.007$                       |
| $k_{off,2} / s^{-1}$           | $0.001 \pm 4.68 \times 10^{-4}$         | $0.006 \pm 0.007$                       | $0.006 \pm 0.005$                       |
| $\bar{k}_{diss} / s^{-1}$      | $0.002 \pm 0.001$                       | $0.006 \pm 9.00 \times 10^{-4}$         | $0.006 \pm 5.73 \times 10^{-4}$         |
| quasi-irrev. bound protein / % | $44.44 \pm 9.45$                        | $60.07 \pm 3.30$                        | $54.31 \pm 4.49$                        |
| initial slope / RU $s^{-1}$    | $14.93 \pm 1.71$                        | $79.33 \pm 6.20$                        | $7.41 \pm 1.19$                         |

**Table S3:** Summary of all kinetic parameters of the interaction of UNC119a-complexed, GDP- and GppNHp-loaded Arl2 and Arl3 as well as UNC119a alone with membranes composed of DOPC/DOPG/DPPC/DPPG/Chol 20:5:45:5:25 (mol %). In the table, the mean value  $\pm$  standard deviation ( $n = 3-4$ ) is given.

|                                   | Arl2•GDP +<br>UNC119a                   | Arl2•GppNHp<br>+ UNC119a                | Arl3•GDP +<br>UNC119a                   | Arl3•GppNHp<br>+ UNC119a                | UNC119a                                 |
|-----------------------------------|-----------------------------------------|-----------------------------------------|-----------------------------------------|-----------------------------------------|-----------------------------------------|
| $k_{on,1} / M^{-1} s^{-1}$        | $1.09 \times 10^4 \pm 2.29 \times 10^3$ | $1.25 \times 10^4 \pm 1.48 \times 10^3$ | $1.32 \times 10^4 \pm 1.88 \times 10^3$ | $1.37 \times 10^4 \pm 2.56 \times 10^3$ | $8.14 \times 10^3 \pm 2.28 \times 10^3$ |
| $k_{on,2} / s^{-1}$               | $0.004 \pm 1.45 \times 10^{-4}$         | $0.004 \pm 0.001$                       | $0.002 \pm 3.76 \times 10^{-4}$         | $0.013 \pm 0.009$                       | $0.002 \pm 6.66 \times 10^{-4}$         |
| $k_{off,1} / s^{-1}$              | $0.085 \pm 0.015$                       | $0.056 \pm 0.025$                       | $0.005 \pm 0.004$                       | $0.004 \pm 0.004$                       | $0.005 \pm 0.005$                       |
| $k_{off,2} / s^{-1}$              | $0.005 \pm 3.22 \times 10^{-4}$         | $0.005 \pm 5.77 \times 10^{-5}$         | $0.006 \pm 0.004$                       | $0.010 \pm 0.005$                       | $0.010 \pm 0.009$                       |
| $\bar{k}_{diss} / s^{-1}$         | $0.034 \pm 0.003$                       | $0.027 \pm 0.017$                       | $0.004 \pm 4.64 \times 10^{-4}$         | $0.005 \pm 3.69 \times 10^{-4}$         | $0.005 \pm 0.002$                       |
| quasi-irrev. bound<br>protein / % | $62.78 \pm 2.52$                        | $55.16 \pm 3.48$                        | $43.03 \pm 5.86$                        | $43.29 \pm 5.04$                        | $60.17 \pm 3.68$                        |
| initial slope /<br>RU $s^{-1}$    | $31.26 \pm 1.25$                        | $22.30 \pm 1.08$                        | $18.64 \pm 1.33$                        | $18.93 \pm 1.63$                        | $7.19 \pm 0.15$                         |

## SUPPORTING REFERENCES

1. Gohlke, A., G. Triola, H. Waldmann, and R. Winter. 2010. Influence of the lipid anchor motif of N-ras on the interaction with lipid membranes: a surface plasmon resonance study. *Biophys. J.* 98:2226–2235.
2. Cooper, M. A., A. Hansson, S. Löfås, and D. H. Williams. 2000. A vesicle capture sensor chip for kinetic analysis of interactions with membrane-bound receptors. *Anal. Biochem.* 277:196–205.
3. Besenicar, M., P. Macek, J. H. Lakey, and G. Anderluh. 2006. Surface plasmon resonance in protein-membrane interactions. *Chem. Phys. Lipids.* 141:169–178.
4. Mozsolits, H., W. G. Thomas, and M. I. Aguilar. 2003. Surface plasmon resonance spectroscopy in the study of membrane-mediated cell signalling. *J. Pept. Sci.* 9:77–89.
5. Weise, K., S. Kapoor, C. Denter, J. Nikolaus, N. Opitz, S. Koch, G. Triola, A. Herrmann, H. Waldmann, and R. Winter. 2011. Membrane-mediated induction and sorting of K-Ras microdomain signaling platforms. *J. Am. Chem. Soc.* 133:880–887.
6. Mendelsohn, R., G. Mao, and C. R. Flach. 2010. Infrared reflection-absorption spectroscopy: principles and applications to lipid-protein interaction in Langmuir films. *Biochim. Biophys. Acta.* 1798:788–800.
